# Supplementary material for: A permeability‐ and perfusion‐based PBPK model for improved prediction of concentration‐time profiles
Source: PubMed Central journal article supplement — Clin Transl Sci. 2022 May 31;15(8):2035–52. doi: 10.1111/cts.13314 (PMC9372417; doi:10.1111/cts.13314), 2022-05-31
Supplement: CTS-15-2035-s001.pdf [file CTS-15-2035-s001.pdf]

# A Permeability- and Perfusion-based PBPK model for Improved Prediction of Concentration-time Profiles

Ken Korzekwa\*, Casey Radice, and Swati Nagar\*

Department of Pharmaceutical Sciences, Temple University School of Pharmacy, Philadelphia, PA 19140

## Supplementary Material

### 1. Derivation of Equations:

Derivation of Eq. 1

$$P_{app,cor} = \frac{P_{aq}P_{app} - P_{aq}P_{para}}{P_{aq} + P_{para} - P_{app}} \quad \text{Eq. 1}$$

Eq. 1 is derived with the use of net clearance concepts in the accompanying tutorial. Briefly, the derivation is as follows.

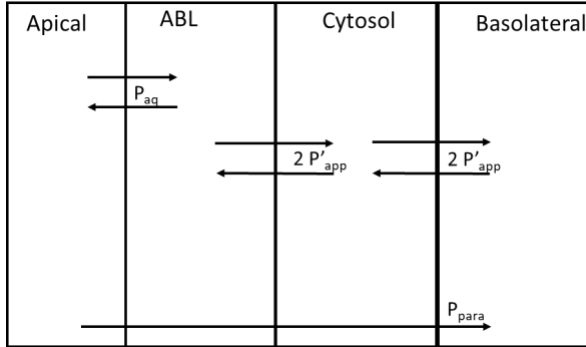

Consider the Figure above, where  $P_{aq}$  is aqueous boundary layer (ABL) permeability and  $P_{para}$  is paracellular permeability. Using net clearances, we know that the permeability across the apical and the basolateral membranes is  $2 P'_{app}$  (Nagar and Korzekwa, DMD 2012; 40: 1649). Thus, the permeability from ABL to basolateral will be the true or ‘corrected’ permeability or  $P_{app,cor}$ . A net permeability through a species is the permeability moving forward across the species times the fraction that moves forward. Thus,

$$P_{app,corr} = \frac{2 P'_{app} 2 P'_{app}}{2 P'_{app} + 2 P'_{app}} = P'_{app} \quad \text{Eq. S1}$$

The permeability from apical to basolateral compartment  $P_{app}$  can now be written as the sum of the net permeability from apical to basolateral and the paracellular permeability from apical to basolateral:

$$P_{app} = \frac{P_{aq}P_{app,cor}}{P_{aq} + P_{app,cor}} + P_{para} \quad \text{Eq. S2}$$

Algebraic rearrangement to solve for  $P_{app,cor}$  gives eq. 1.

Derivation of Eq. 3-5

$$BP_{corr} = BP - \frac{P_{app,lp}}{P_{app,lp} + P_{app}} f_{up} Hct \quad \text{Eq. 3}$$

$$BP_{C0} = BP - f_{up} Hct \quad \text{Eq. 4}$$

$$K_{ery,C0} = \frac{BP_{C0} - (1 - Hct)}{f_{up} Hct} \quad \text{Eq. 5}$$

For the general concept of blood-to-plasma ratio and erythrocyte partition coefficient, it is useful to start with the mass balance and subsequent steps as detailed in Rowland and Tozer's Clinical Pharmacokinetics and Pharmacodynamics: Concepts and Applications, Appendix D Plasma-to-blood concentration ratio.

The only difference in the present work is the consideration of RBC partitioning of drugs as two components: partitioning into the RBC cytosol, and partitioning into the external RBC membrane (hypothesized partitioning into endothelial glycocalyx).

Thus,

Amount in blood = Amount in plasma + Amount in RBC

Therefore, for either a low-permeability drug or for considering the 'shallow' compartment C<sub>0</sub>, assuming a fast equilibrium between the drug and the external RBC,

Amount in blood = Amount in plasma + (Total amount in RBC – amount in RBC cytosol)

$$C_B V_B = C_p V_p + (C_{RBC} V_{RBC} - C_u V_{RBC}) \quad \text{Eq. S3}$$

Substituting in hematocrit (Hct) for  $V_{RBC}/V_B$ , and  $(1-Hct)V_B$  for  $V_p$ ,

$$C_B V_B = C_p (1-Hct) V_B + (C_{RBC} Hct V_B - C_u Hct V_B) \quad \text{Eq. S4}$$

Dividing throughout by  $C_p V_B$  gives the blood-to-plasma (BP') ratio,  $C_B/C_p$ :

$$C_B/C_p = 1-Hct + Hct (C_{RBC}/C_p) - f_{up} Hct \quad \text{Eq. S5}$$

Where  $f_{up} = C_u/C_p$ . Defining the RBC partition ratio as  $K_{pBC} = C_{RBC}/C_u$ ,

$$C_B/C_p = 1 + Hct [f_{up} K_{pBC} - f_{up} - 1] \quad \text{Eq. S6}$$

Comparing eq. S5 for BP' with the equation for BP [Appendix B, Rowland and Tozer text], one can easily see that

$$BP' = BP - f_{up} Hct \quad \text{Eq. S7}$$

A special case of eq. S7 can be derived for low-permeability drugs, where a fast equilibrium between the drug and the external RBC may be missed in an experimental BP; thus, where  $P_{app}$  (the MDCK or Caco-2 permeability ( $10^{-6}$  cm/sec)), and  $P_{app,lp}$  (a low permeability constant set to  $2 \times 10^{-6}$  cm/sec) are used to provide a correction to the experimental BP:

$$BP_{corr} = BP - \frac{P_{app,lp}}{P_{app,lp} + P_{app}} f_{up} Hct \quad \text{Eq. 3}$$

Thus, for a low permeability drug, the term  $P_{app} \ll P_{app,lp}$  and 'f<sub>up</sub> Hct' will be subtracted from BP. Eq. S7 can be written for the special case of a shallow compartment C<sub>0</sub> as:

$$BP_{C0} = BP - f_{up} Hct \quad \text{Eq. 4}$$

Finally, analogous to  $K_{pBC}$ , we define the partition coefficient for external association with erythrocytes ( $K_{ery,C0}$ ) as  $K_{ery,C0} = (C_{RBC} - C_u)/C_u$ . Thus,  $K_{ery,C0} = K_{pBC} - 1$ , or from eq. S5,

$$BP_{C0} = 1 - Hct + f_{up} Hct [(C_{RBC} - C_u)/C_u] \quad \text{Eq. S8}$$

Substituting in and solving for  $K_{ery,C0} = (C_{RBC} - C_u)/C_u$  gives:

$$K_{ery,C0} = \frac{BP_{C0} - (1 - Hct)}{f_{up} Hct} \quad \text{Eq. 5}$$

## 2. Model for capillary SA prediction from blood flow

| Tissue  | SA<br>cm <sup>2</sup> /cm <sup>3</sup> | flow<br>L/min/L |
|---------|----------------------------------------|-----------------|
| adipose | 83                                     | 0.0227929       |
| brain   | 240                                    | 0.487857        |
| kidney  | 500                                    | 3.4871          |
| liver   | 250                                    | 0.797253        |
| muscle  | 70                                     | 0.0345357       |

Data from Crone (26) and Belcik (27). Kidney SA was divided by 0.7 since the reported value was for the cortex only. SA was assumed to be proportional to flow<sup>1/2</sup> by dimensional analysis:

$$SA = a \text{ flow}^{0.5}$$

Weighting 1/Y  
R<sup>2</sup> = 0.97

| Param | Estimate | Std Error | t-Statistic | P-Value  |
|-------|----------|-----------|-------------|----------|
| a     | 292.778  | 24.7439   | 11.8323     | 0.000292 |

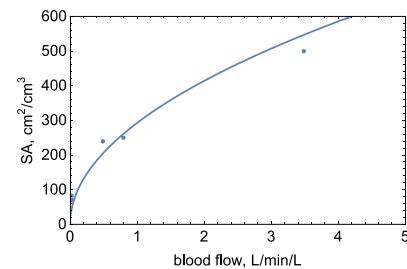

## 3. References for Table 2

References for training set experimental data in Table 2 are provided below.

f<sub>up</sub> 1-22

f<sub>um</sub> 3, 7, 15, 17, 21, 23-33

BP 5, 7, 17, 34-40

P<sub>app</sub> 2, 41-57

References for test set experimental data in Table 2 are provided below.

Aprepitant 58-61

Bumetanide 62-65

Buprenorphine 66, 67

Ciprofloxacin 58, 68-72

Zidovudine <sup>17, 71-74</sup>

Clinical Data References: Cefazolin <sup>75</sup>, Diclofenac <sup>76</sup>, Furosemide <sup>77</sup>, Glyburide <sup>78</sup>, Ketoprofen <sup>79</sup>, Nafcillin <sup>80</sup>, Warfarin <sup>81</sup>, Caffeine <sup>82</sup>, Diazepam <sup>83</sup>, Fluconazole <sup>84</sup>, Midazolam <sup>85</sup>, Phenytoin <sup>86</sup>, Atenolol <sup>87</sup>, Betaxolol <sup>88</sup>, Carvedilol <sup>89</sup>, Diltiazem <sup>90</sup>, Diphenhydramine <sup>91</sup>, Imipramine <sup>92</sup>, Metoprolol <sup>93</sup>, Mibefradil <sup>94</sup>, Quinidine <sup>95</sup>, Ranitidine <sup>96</sup>, Terbutaline <sup>97</sup>, Verapamil <sup>98</sup>, Aprepitant <sup>99</sup>, Bumetanide <sup>100</sup>, Buprenorphine <sup>101</sup>, Ciprofloxacin <sup>102</sup>, Zidovudine <sup>103</sup>

References for fe: <sup>104</sup>

- (1) Curran, R.E., Claxton, C.R.J., Hutchison, L. *et al.* Control and measurement of plasma pH in equilibrium dialysis: Influence on drug plasma protein binding. *Drug Metabolism and Disposition* **39**, 551 (2011).
- (2) Gertz, M., Harrison, A., Houston, J.B. *et al.* Prediction of human intestinal first-pass metabolism of 25 cyp3a substrates from in vitro clearance and permeability data. *Drug Metab Dispos* **38**, 1147-58 (2010).
- (3) Holt, K., Ye, M., Nagar, S. *et al.* Prediction of tissue-plasma partition coefficients using microsomal partitioning: Incorporation into physiologically based pharmacokinetic models and steady-state volume of distribution predictions. *Drug Metab Dispos* **47**, 1050-60 (2019).
- (4) Di, L., Umland, J.P., Chang, G. *et al.* Species independence in brain tissue binding using brain homogenates. *Drug Metab Dispos* **39**, 1270-7 (2011).
- (5) Chan, R., De Bruyn, T., Wright, M. *et al.* Comparing mechanistic and preclinical predictions of volume of distribution on a large set of drugs. *Pharmaceutical Research* **35**, 11 (2018).
- (6) Obach, R.S., Lombardo, F. & Waters, N.J. Trend analysis of a database of intravenous pharmacokinetic parameters in humans for 670 drug compounds. *Drug Metab Dispos* **36**, 1385-405 (2008).
- (7) Obach, R.S. Prediction of human clearance of twenty-nine drugs from hepatic microsomal intrinsic clearance data: An examination of in vitro half-life approach and nonspecific binding to microsomes. *Drug Metab Dispos* **27**, 1350-9 (1999).
- (8) Kochansky, C.J., McMasters, D.R., Lu, P. *et al.* Impact of pH on plasma protein binding in equilibrium dialysis. *Mol Pharm* **5**, 438-48 (2008).
- (9) Borchard, U. Pharmacological properties of  $\beta$ -adrenoceptor blocking drugs. *Journal of Clinical and Basic Cardiology* **1**, 5-9 (1998).
- (10) Votano, J.R., Parham, M., Hall, L.M. *et al.* Qsar modeling of human serum protein binding with several modeling techniques utilizing structure-information representation. *Journal of Medicinal Chemistry* **49**, 7169-81 (2006).
- (11) Yamazaki, K. & Kanaoka, M. Computational prediction of the plasma protein-binding percent of diverse pharmaceutical compounds. *J Pharm Sci* **93**, 1480-94 (2004).
- (12) Stader, F., Kinvig, H., Penny, M.A. *et al.* Physiologically based pharmacokinetic modelling to identify pharmacokinetic parameters driving drug exposure changes in the elderly. *Clinical Pharmacokinetics* **59**, 383-401 (2020).

- (13) Riley, R.J., McGinnity, D.F. & Austin, R.P. A unified model for predicting human hepatic, metabolic clearance from in vitro intrinsic clearance data in hepatocytes and microsomes. *Drug Metab Dispos* **33**, 1304-11 (2005).
- (14) Kim, S.J., Lee, K.R., Miyauchi, S. *et al.* Extrapolation of in vivo hepatic clearance from in vitro uptake clearance by suspended human hepatocytes for anionic drugs with high binding to human albumin: Improvement of in vitro-to-in vivo extrapolation by considering the "albumin-mediated" hepatic uptake mechanism on the basis of the "facilitated-dissociation model". *Drug Metab Dispos* **47**, 94-103 (2019).
- (15) Rioux, N., Batonga, J., Colombo, F. *et al.* A simplified approach to predict cyp3a-mediated drug–drug interactions at early drug discovery: Validation with clinical data. *Xenobiotica* **43**, 592-7 (2013).
- (16) Kratochwil, N.A., Huber, W., Müller, F. *et al.* Predicting plasma protein binding of drugs: A new approach. *Biochemical Pharmacology* **64**, 1355-74 (2002).
- (17) Wood, F.L., Houston, J.B. & Hallifax, D. Clearance prediction methodology needs fundamental improvement: Trends common to rat and human hepatocytes/microsomes and implications for experimental methodology. *Drug Metabolism and Disposition* **45**, 1178-88 (2017).
- (18) Varma, M.V.S., Obach, R.S., Rotter, C. *et al.* Physicochemical space for optimum oral bioavailability: Contribution of human intestinal absorption and first-pass elimination. *J Med Chem* **53**, 1098-108 (2010).
- (19) Hinderling, P.H. & Hartmann, D. The ph dependency of the binding of drugs to plasma proteins in man. *Ther Drug Monit* **27**, 71-85 (2005).
- (20) Pacifici, G.M., Viani, A., Schulz, H.U. *et al.* Plasma protein binding of furosemide in the elderly. *European Journal of Clinical Pharmacology* **32**, 199-202 (1987).
- (21) Brown, H.S., Griffin, M. & Houston, J.B. Evaluation of cryopreserved human hepatocytes as an alternative in vitro system to microsomes for the prediction of metabolic clearance. *Drug Metab Dispos* **35**, 293-301 (2007).
- (22) Proks, P., Kramer, H., Haythorne, E. *et al.* Binding of sulphonylureas to plasma proteins – a katp channel perspective. *PLOS ONE* **13**, e0197634 (2018).
- (23) Austin, R.P., Barton, P., Cockroft, S.L. *et al.* The influence of nonspecific microsomal binding on apparent intrinsic clearance, and its prediction from physicochemical properties. *Drug Metab Dispos* **30**, 1497-503 (2002).
- (24) Kilford, P.J., Gertz, M., Houston, J.B. *et al.* Hepatocellular binding of drugs: Correction for unbound fraction in hepatocyte incubations using microsomal binding or drug lipophilicity data. *Drug Metab Dispos* **36**, 1194-7 (2008).
- (25) Naritomi, Y., Terashita, S., Kimura, S. *et al.* Prediction of human hepatic clearance from in vivo animal experiments and in vitro metabolic studies with liver microsomes from animals and humans. *Drug Metab Dispos* **29**, 1316-24 (2001).
- (26) Li, H., Sun, J., Sui, X. *et al.* Structure-based prediction of the nonspecific binding of drugs to hepatic microsomes. *The AAPS Journal* **11**, 364-70 (2009).
- (27) Poulin, P. & Haddad, S. Microsome composition-based model as a mechanistic tool to predict nonspecific binding of drugs in liver microsomes. *J Pharm Sci* **100**, 4501-17 (2011).

- (28) McLure, J.A., Miners, J.O. & Birkett, D.J. Nonspecific binding of drugs to human liver microsomes. *British Journal of Clinical Pharmacology* **49**, 453-61 (2002).
- (29) Gertz, M., Kilford, P.J., Houston, J.B. *et al.* Drug lipophilicity and microsomal protein concentration as determinants in the prediction of the fraction unbound in microsomal incubations. *Drug Metab Dispos* **36**, 535-42 (2008).
- (30) Reddy, V.P., Jones, B.C., Colclough, N. *et al.* An investigation into the prediction of the plasma concentration-time profile and its interindividual variability for a range of flavin-containing monooxygenase substrates using a physiologically based pharmacokinetic modeling approach. *Drug Metabolism and Disposition* **46**, 1259-67 (2018).
- (31) Burns, K., Nair, P.C., Rowland, A. *et al.* The nonspecific binding of tyrosine kinase inhibitors to human liver microsomes. *Drug Metab Dispos* **43**, 1934-7 (2015).
- (32) Gao, H., Yao, L., Mathieu, H.W. *et al.* In silico modeling of nonspecific binding to human liver microsomes. *Drug Metab Dispos* **36**, 2130-5 (2008).
- (33) Barr, J.T., Lade, J.M., Tran, T.B. *et al.* Fraction unbound for liver microsome and hepatocyte incubations for all major species can be approximated using a single-species surrogate. *Drug Metabolism and Disposition* **47**, 419-23 (2019).
- (34) Imawaka, H., Ito, K., Kitamura, Y. *et al.* Prediction of human bioavailability from human oral administration data and animal pharmacokinetic data without data from intravenous administration of drugs in humans. *Pharmaceutical Research* **26**, 1881-9 (2009).
- (35) Kamiya, Y., Otsuka, S., Miura, T. *et al.* Physiologically based pharmacokinetic models predicting renal and hepatic concentrations of industrial chemicals after virtual oral doses in rats. *Chemical Research in Toxicology*, (2020).
- (36) Uchimura, T., Kato, M., Saito, T. *et al.* Prediction of human blood-to-plasma drug concentration ratio. *Biopharm Drug Dispos*, n/a-n/a (2010).
- (37) Welker, H.A., Wiltshire, H. & Bullingham, R. Clinical pharmacokinetics of mibefradil. *Clinical Pharmacokinetics* **35**, 405-23 (1998).
- (38) Taylor, E. & Turner, P. The distribution of propranolol, pindolol and atenolol between human erythrocytes and plasma. *British Journal of Clinical Pharmacology* **12**, 543-8 (1981).
- (39) Yu, S., Li, S., Yang, H. *et al.* A novel liquid chromatography/tandem mass spectrometry based depletion method for measuring red blood cell partitioning of pharmaceutical compounds in drug discovery. *Rapid Communications in Mass Spectrometry* **19**, 250-4 (2005).
- (40) Chapa, R., Li, C.Y., Basit, A. *et al.* Contribution of uptake and efflux transporters to oral pharmacokinetics of furosemide. *ACS Omega* **5**, 32939-50 (2020).
- (41) Li, C., Liu, T., Cui, X. *et al.* Development of in vitro pharmacokinetic screens using caco-2, human hepatocyte, and caco-2/human hepatocyte hybrid systems for the prediction of oral bioavailability in humans. *J Biomol Screen* **12**, 1084-91 (2007).
- (42) Pham-The, H., González-Álvarez, I., Bermejo, M. *et al.* The use of rule-based and qspr approaches in adme profiling: A case study on caco-2 permeability. *Molecular Informatics* **32**, 459-79 (2013).

- (43) Pham-The, H., Casañola-Martin, G., Garrigues, T. *et al.* Exploring different strategies for imbalanced adme data problem: Case study on caco-2 permeability modeling. *Molecular Diversity* **20**, 93-109 (2016).
- (44) Varma, M.V., Gardner, I., Steyn, S.J. *et al.* Ph-dependent solubility and permeability criteria for provisional biopharmaceutics classification (bcs and bddcs) in early drug discovery. *Molecular Pharmaceutics* **9**, 1199-212 (2012).
- (45) Varma, M.V.S., Sateesh, K. & Panchagnula, R. Functional role of p-glycoprotein in limiting intestinal absorption of drugs: Contribution of passive permeability to p-glycoprotein mediated efflux transport. *Molecular Pharmaceutics* **2**, 12-21 (2005).
- (46) Zhang, Y.-N., Yang, Y.-F. & Yang, X.-W. Blood-brain barrier permeability and neuroprotective effects of three main alkaloids from the fruits of euodia rutaecarpa with mdck-phamdr cell monolayer and pc12 cell line. *Biomedicine & Pharmacotherapy* **98**, 82-7 (2018).
- (47) Hellinger, E., Veszelka, S., Tóth, A.E. *et al.* Comparison of brain capillary endothelial cell-based and epithelial (mdck-mdr1, caco-2, and vb-caco-2) cell-based surrogate blood-brain barrier penetration models. *Eur J Pharm Biopharm* **82**, 340-51 (2012).
- (48) Berben, P., Brouwers, J. & Augustijns, P. Assessment of passive intestinal permeability using an artificial membrane insert system. *J Pharm Sci* **107**, 250-6 (2018).
- (49) Camenisch, G., Alsenz, J., van de Waterbeemd, H. *et al.* Estimation of permeability by passive diffusion through caco-2 cell monolayers using the drugs' lipophilicity and molecular weight. *Eur J Pharm Sci* **6**, 317-24 (1998).
- (50) Pauli-Magnus, C., Rekersbrink, S., Klotz, U. *et al.* Interaction of omeprazole, lansoprazole and pantoprazole with p-glycoprotein. *Naunyn-Schmiedeberg's Archives of Pharmacology* **364**, 551-7 (2001).
- (51) Yazdanian, M., Glynn, S.L., Wright, J.L. *et al.* Correlating partitioning and caco-2 cell permeability of structurally diverse small molecular weight compounds. *Pharm Res* **15**, 1490-4 (1998).
- (52) Karlsson, J. & Artursson, P. A method for the determination of cellular permeability coefficients and aqueous boundary layer thickness in monolayers of intestinal epithelial (caco-2) cells grown in permeable filter chambers. *International Journal of Pharmaceutics* **71**, 55-64 (1991).
- (53) Skolnik, S., Lin, X., Wang, J. *et al.* Towards prediction of in vivo intestinal absorption using a 96-well caco-2 assay. **99**, 3246-65 (2010).
- (54) Volpe, D.A. Application of method suitability for drug permeability classification. *The AAPS Journal* **12**, 670-8 (2010).
- (55) Chen, C., Zhou, H., Guan, C. *et al.* Applicability of free drug hypothesis to drugs with good membrane permeability that are not efflux transporter substrates: A microdialysis study in rats. *Pharmacology Research & Perspectives* **8**, (2020).
- (56) Thiel-Demby, V.E., Humphreys, J.E., St. John Williams, L.A. *et al.* Biopharmaceutics classification system: Validation and learnings of an in vitro permeability assay. *Molecular Pharmaceutics* **6**, 11-8 (2009).
- (57) Irvine, J.D., Takahashi, L., Lockhart, K. *et al.* Mdck (madin-darby canine kidney) cells: A tool for membrane permeability screening. *J Pharm Sci* **88**, 28-33 (1999).

- (58) Murad, N., Pasikanti, K.K., Madej, B.D. *et al.* Predicting volume of distribution in humans: Performance of in silico methods for a large set of structurally diverse clinical compounds. *Drug Metabolism and Disposition* **49**, 169-78 (2021).
- (59) Bergman, A.J., Marbury, T., Fosbinder, T. *et al.* Effect of impaired renal function and haemodialysis on the pharmacokinetics of aprepitant. *Clinical Pharmacokinetics* **44**, 637-47 (2005).
- (60) Riedmaier, A.E., Dement, K., Huckle, J. *et al.* Use of physiologically based pharmacokinetic (pbpk) modeling for predicting drug-food interactions: An industry perspective. *The AAPS Journal* **22**, (2020).
- (61) Litou, C., Patel, N., Turner, D.B. *et al.* Combining biorelevant in vitro and in silico tools to simulate and better understand the in vivo performance of a nano-sized formulation of aprepitant in the fasted and fed states. *European Journal of Pharmaceutical Sciences* **138**, 105031 (2019).
- (62) Pentikäinen, P.J., Penttilä, A., Neuvonen, P.J. *et al.* Fate of [14c]-bumetanide in man. *Br J Clin Pharmacol* **4**, 39-44 (1977).
- (63) Pentikäinen, P.J., Neuvonen, P.J., Kekki, M. *et al.* Pharmacokinetics of intravenously administered bumetanide in man. *Journal of Pharmacokinetics and Biopharmaceutics* **8**, 219-28 (1980).
- (64) Donovan, M.D., Abduljalil, K., Cryan, J.F. *et al.* Application of a physiologically-based pharmacokinetic model for the prediction of bumetanide plasma and brain concentrations in the neonate. *Biopharm Drug Dispos* **39**, 125-34 (2018).
- (65) Hatley, O.J.D. *Mechanistic prediction of intestinal first-pass metabolism using in vitro data in preclinical species and in man* Doctor of Philosophy, University of Manchester. (2014).
- (66) Cubitt, H.E., Houston, J.B. & Galetin, A. Relative importance of intestinal and hepatic glucuronidation-impact on the prediction of drug clearance. *Pharm Res* **26**, 1073-83 (2009).
- (67) Liu, T. & Gobburu, J.V.S. A physiologically based pharmacokinetic modeling approach to predict drug-drug interactions of buprenorphine after subcutaneous administration of cam2038 with perpetrators of cyp3a4. *J Pharm Sci* **107**, 942-8 (2018).
- (68) Zhou, D., Bui, K., Sostek, M. *et al.* Simulation and prediction of the drug-drug interaction potential of naloxegol by physiologically based pharmacokinetic modeling. *CPT: Pharmacometrics & Systems Pharmacology* **5**, 250-7 (2016).
- (69) Ruiz-García, A., Lin, H., Plá-Delfina, J.M. *et al.* Kinetic characterization of secretory transport of a new ciprofloxacin derivative (cnv97100) across caco-2 cell monolayers\*\*this work has been submitted for the partial fulfillment of the requirement for a ph.D. Degree in pharmaceutics at the university o. *Journal of Pharmaceutical Sciences* **91**, 2511-9 (2002).
- (70) Bergström, C.A.S., Strafford, M., Lazorova, L. *et al.* Absorption classification of oral drugs based on molecular surface properties. *Journal of Medicinal Chemistry* **46**, 558-70 (2003).
- (71) Hsu, F., Chen, Y.-C. & Broccatelli, F. Evaluation of tissue binding in three tissues across five species and prediction of volume of distribution from plasma protein and tissue binding with an existing model. *Drug Metabolism and Disposition* **49**, 330-6 (2021).



- (72) Lin, X., Skolnik, S., Chen, X. *et al.* Attenuation of intestinal absorption by major efflux transporters: Quantitative tools and strategies using a caco-2 model. *Drug Metabolism and Disposition* **39**, 265-74 (2011).
- (73) Nair, P.C., McKinnon, R.A. & Miners, J.O. A fragment-based approach for the computational prediction of the nonspecific binding of drugs to hepatic microsomes. *Drug Metabolism and Disposition* **44**, 1794-8 (2016).
- (74) O'Hagan, S. & Kell, D.B. The apparent permeabilities of caco-2 cells to marketed drugs: Magnitude, and independence from both biophysical properties and endogenite similarities. *PeerJ* **3**, e1405 (2015).
- (75) Lee, F.H., Pfeffer, M., Van Harken, D.R. *et al.* Comparative pharmacokinetics of ceforanide (bl-s786r) and cefazolin in laboratory animals and humans. *Antimicrobial Agents and Chemotherapy* **17**, 188-92 (1980).
- (76) Willis, J.V., Kendall, M.J. & Jack, D.B. A study of the effect of aspirin on the pharmacokinetics of oral and intravenous diclofenac sodium. *European Journal of Clinical Pharmacology* **18**, 415-8 (1980).
- (77) Hammarlund, M.M., Paalzow, L.K. & Odland, B. Pharmacokinetics of furosemide in man after intravenous and oral administration. Application of moment analysis. *Eur J Clin Pharmacol* **26**, 197-207 (1984).
- (78) Neugebauer, G., Betzien, G., Hrstka, V. *et al.* Absolute bioavailability and bioequivalence of glibenclamide (semi-euglucon n). *Int J Clin Pharmacol Ther Toxicol* **23**, 453-60 (1985).
- (79) Debruyne, D., Hurault de Ligny, B., Ryckelynck, J.P. *et al.* Clinical pharmacokinetics of ketoprofen after single intravenous administration as a bolus or infusion. *Clin Pharmacokinet* **12**, (1987).
- (80) Waller, E.S., Sharanevych, M.A. & Yakatan, G.J. The effect of probenecid on nafcillin disposition. *Journal of Clinical Pharmacology* **22**, 482-9 (1982).
- (81) O'Reilly, R.A., Welling, P.G. & Wagner, J.G. Pharmacokinetics of warfarin following intravenous administration to man. *Thrombosis Et Diathesis Haemorrhagica* **25**, 178-& (1971).
- (82) Blanchard, J. & Sawers, S.J.A. The absolute bioavailability of caffeine in man. *European Journal of Clinical Pharmacology* **24**, 93-8 (1983).
- (83) Agarwal, S.K., Kriel, R.L., Brundage, R.C. *et al.* A pilot study assessing the bioavailability and pharmacokinetics of diazepam after intranasal and intravenous administration in healthy volunteers. *Epilepsy Res* **105**, 362-7 (2013).
- (84) Brammer, K.W., Farrow, P.R. & Faulkner, J.K. Pharmacokinetics and tissue penetration of fluconazole in humans. *Clinical infectious diseases* **12**, S318-S26 (1990).
- (85) Heizmann, P., Eckert, M. & Ziegler, W.H. Pharmacokinetics and bioavailability of midazolam in man. *Br J Clin Pharmacol* **16 Suppl 1**, 43S-9S (1983).
- (86) Gugler, R., Manion, C.V. & Azarnoff, D.L. Phenytoin - pharmacokinetics and bioavailability. *Clinical Pharmacology & Therapeutics* **19**, 135-42 (1976).
- (87) Mason, W.D., Winer, N., Kochak, G. *et al.* Kinetics and absolute bioavailability of atenolol. *Clin Pharmacol Ther* **25**, 408-15 (1979).
- (88) Ludden, T.M., Boyle, D.A., Gieseke, D. *et al.* Absolute bioavailability and dose proportionality of betaxolol in normal healthy-subjects. *Journal of Pharmaceutical Sciences* **77**, 779-83 (1988).

- (89) Neugebauer, G., Akpan, W., von Möllendorff, E. *et al.* Pharmacokinetics and disposition of carvedilol in humans. *J Cardiovasc Pharmacol* **10 Suppl 11**, S85-8 (1987).
- (90) Hermann, P., Rodger, S.D., Remones, G. *et al.* Pharmacokinetics of diltiazem after intravenous and oral-administration. *European Journal of Clinical Pharmacology* **24**, 349-52 (1983).
- (91) Blyden, G.T., Greenblatt, D.J., Scavone, J.M. *et al.* Pharmacokinetics of diphenhydramine and a demethylated metabolite following intravenous and oral administration. *J Clin Pharmacol* **26**, 529-33 (1986).
- (92) Abernethyl, D.R., Divoll, M., Greenblatt, D.J. *et al.* Absolute bioavailability of imipramine: Influence of food. *Psychopharmacology* **83**, 104-6 (1984).
- (93) Regårdh, C., Borg, K., Johansson, R. *et al.* Pharmacokinetic studies on the selective beta1-receptor antagonist metoprolol in man. *Journal of Pharmacokinetics and Biopharmaceutics* **2**, 347-64 (1974).
- (94) Clozel, J.P., Osterrieder, W., Kleinbloesem, C.H. *et al.* Ro 40-5967 - a new nonhydropyridine calcium-antagonist. *Cardiovascular Drug Reviews* **9**, 4-17 (1991).
- (95) Ueda, C. & Dzindzio, B. Bioavailability of quinidine in congestive heart failure. *British Journal of Clinical Pharmacology* **11**, 571-7 (1981).
- (96) McNeil, J.J., Mihaly, G.W., Anderson, A. *et al.* Pharmacokinetics of the h2- receptor antagonist ranitidine in man. *Br J Clin Pharmacol* **12**, 411-5 (1981).
- (97) Nyberg, L. Pharmacokinetic parameters of terbutaline in healthy man. An overview. *Eur J Respir Dis Suppl* **134**, 149-60 (1984).
- (98) Dominic, J.A., Bourne, D.W., Tan, T.G. *et al.* The pharmacology of verapamil. Iii. Pharmacokinetics in normal subjects after intravenous drug administration. *J Cardiovasc Pharmacol* **3**, 25-38 (1981).
- (99) Majumdar, A.K., Howard, L., Goldberg, M.R. *et al.* Pharmacokinetics of aprepitant after single and multiple oral doses in healthy volunteers. *The Journal of Clinical Pharmacology* **46**, 291-300 (2006).
- (100) Lau, H.S.H., Hyncek, M.L., Berardi, R.R. *et al.* Kinetics, dynamics, and bioavailability of bumetanide in healthy subjects and patients with chronic renal failure. *Clinical Pharmacology and Therapeutics* **39**, 635-45 (1986).
- (101) Huestis, M.A., Cone, E.J., Pirnay, S.O. *et al.* Intravenous buprenorphine and norbuprenorphine pharmacokinetics in humans. *Drug and Alcohol Dependence* **131**, 258-62 (2013).
- (102) Borner, K., Höffken, G., Lode, H. *et al.* Pharmacokinetics of ciprofloxacin in healthy volunteers after oral and intravenous administration. *European Journal of Clinical Microbiology* **5**, 179-86 (1986).
- (103) Cload, P.A. A review of the pharmacokinetics of zidovudine in man. *J Infect* **18 Suppl 1**, 15-21 (1989).
- (104) Brunton, L., Lazo, J., Parker, K. *Goodman and Gilman's the pharmacological basis of therapeutics* (McGraw-Hill New York: 2006).

## 4. Mathematica code for Rodgers and Rowland, memPBPK, and PermQ

### Models for Rodgers and Rowland, memPBPK, and PermQ

Drug specific parameters

```
In[ ]:= ClearAll["Global`*"];
```

```
In[ ]:= SetDirectory["/Users/swatinagar/Dropbox/PermQ"];
```

```
In[ ]:= drugfile = "DatainputPQ11.xlsx";
```

```
In[ ]:= speciesfile = "species.10.xlsx";
```

```
In[ ]:= sheet = 6;
```

```
In[ ]:= {name, class, logp, fup, fum, pkaa, pkab, bp, logdvo, anflag, bflag, pappsec, mw} =  
  {"Midazolam", "neutral", 3.15, 0.0345, 0.68,  
   14., 6.01, 0.71, 2.16225, 0., 1., 0.0000424, 325.8};
```

```
In[ ]:= name
```

```
Out[ ]:= Midazolam
```

```
In[ ]:= dose = 10.;
```

```
In[ ]:= ntp = 15;
```

```
In[ ]:= ivduration = 1.;
```

```
In[ ]:= fe = 0.;
```

```
In[ ]:= avgwt = 70.;
```

```
In[ ]:= kinf = dose / ivduration
```

```
Out[ ]:= 10.
```

```
In[ ]:= tt = {5., 10., 15., 30., 45., 60., 90., 120., 180., 240., 300., 360., 480., 600., 720.};
```

```
In[ ]:= ct = {0.321548, 0.264365, 0.244248, 0.204901, 0.164813, 0.140331, 0.105878, 0.0827978,  
  0.0489842, 0.0363431, 0.0254625, 0.0196616, 0.00918061, 0.00810542, 0.00713468};
```

```
In[ ]:= ctt = {{5., 0.321548}, {10., 0.264365}, {15., 0.244248}, {30., 0.204901},  
  {45., 0.164813}, {60., 0.140331}, {90., 0.105878}, {120., 0.0827978},  
  {180., 0.0489842}, {240., 0.0363431}, {300., 0.0254625}, {360., 0.0196616},  
  {480., 0.00918061}, {600., 0.00810542}, {720., 0.00713468}}
```

```
Out[ ]:= {{5., 0.321548}, {10., 0.264365}, {15., 0.244248}, {30., 0.204901},  
  {45., 0.164813}, {60., 0.140331}, {90., 0.105878}, {120., 0.0827978},  
  {180., 0.0489842}, {240., 0.0363431}, {300., 0.0254625}, {360., 0.0196616},  
  {480., 0.00918061}, {600., 0.00810542}, {720., 0.00713468}}
```

```
In[ ]:= pow = 10 ^ logp;
```

```
In[ ]:= dvo = 10 ^ logdvo;
```

Apply to drug PK model for an IV infusion dose.

```
In[ ]:= ClearAll[modelpkiv1, modelpkiv2]
```

```
In[ ]:= colort = {Red, Blue, Orange, Green, Purple, Cyan, Brown};
```

```
In[ ]:= plotfit1 = ListLogPlot[ctt, PlotStyle → Black]
```

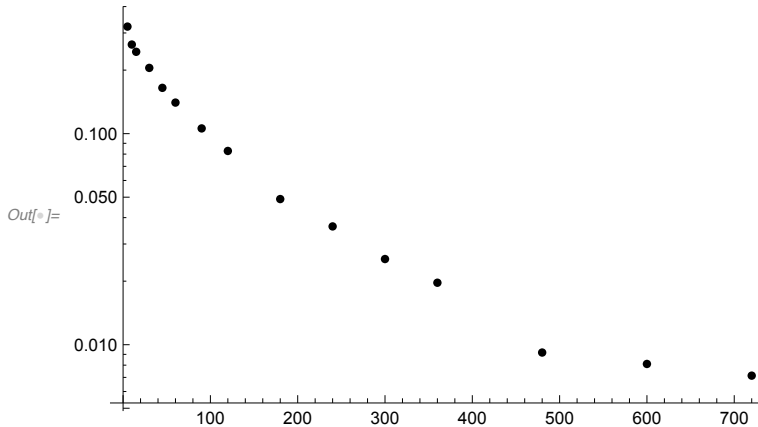

```
In[ ]:= k12init = 0.06;
```

```
k21init = 0.09;
```

```
k13init = 0.005;
```

```
k31init = 0.005;
```

```
k10init = 0.01;
```

```
V1init = 30;
```

```
kinf = dose / ivduration
```

```
Out[ ]:= 10.
```

```
In[ ]:= ClearAll[k12, k21, k13, k31, k10, V1, modelpkiv1, fitiv];
```

```
modelpkiv1[k12_?NumericQ, k21_?NumericQ, k13_?NumericQ,
```

```
k31_?NumericQ, k10_?NumericQ, V1_?NumericQ, te_?NumericQ] :=
```

```
(model1[k12, k21, k13, k31, k10, V1][t] = (Xc[te] / V1) /.
```

```
First[NDSolve[{Xc'[t] == k0[t] - (k12 + k13 + k10) Xc[t] + k21 Xp1[t] + k31 Xp2[t],
```

```
Xp1'[t] == k12 Xc[t] - k21 Xp1[t],
```

```
Xp2'[t] == k13 Xc[t] - k31 Xp2[t],
```

```
k0'[t] == 0,
```

```
Xc[0] == 0,
```

```
Xp1[0] == 0,
```

```
Xp2[0] == 0,
```

```
k0[0] == kinf, WhenEvent[t == ivduration, k0[t] → 0.]},
```

```
{Xc, Xp1, Xp2, k0},
```

```
{t, 0, 1.5 ctt[[ntp, 1]]}, MaxSteps → 100 000, PrecisionGoal → ∞]])
```

```
In[ ]:= fitiv = NonlinearModelFit[ctt,  
  modelpkiv1[k12, k21, k13, k31, k10, V1, te], {{k12, k12init}, {k21, k21init},  
  {k13, k13init}, {k31, k31init}, {k10, k10init}, {V1, V1init}},  
  {te}, PrecisionGoal -> ∞, MaxIterations -> 100 000, Weights -> (1 / #2 &)]
```

```
Out[ ]:= FittedModel [ modelpkiv1[0.076191, 0.152248, 0.00508624, <<21>>, <<21>>, 22.6398, te] ]
```

```
In[ ]:= fitiv["ParameterTable"]
```

|              | Estimate   | Standard Error | t-Statistic | P-Value     |
|--------------|------------|----------------|-------------|-------------|
| k12          | 0.076191   | 0.0623857      | 1.22129     | 0.253002    |
| k21          | 0.152248   | 0.0574936      | 2.64809     | 0.0265592   |
| Out[ ]:= k13 | 0.00508624 | 0.00148771     | 3.41884     | 0.00764189  |
| k31          | 0.00525378 | 0.00136166     | 3.85836     | 0.00385672  |
| k10          | 0.012971   | 0.00244904     | 5.29637     | 0.000496235 |
| V1           | 22.6398    | 4.30817        | 5.25509     | 0.000524143 |

```
In[ ]:= fitiv["RSquared"]
```

```
Out[ ]:= 0.998783
```

```
In[ ]:= fitiv["AICc"]
```

```
Out[ ]:= -101.582
```

```
In[ ]:= TableForm[fitiv["CorrelationMatrix"]]
```

```
Out[ ]//TableForm=
```

|           |           |           |           |           |           |
|-----------|-----------|-----------|-----------|-----------|-----------|
| 1.        | 0.914652  | 0.854205  | 0.236037  | 0.9762    | -0.981913 |
| 0.914652  | 1.        | 0.868922  | 0.393688  | 0.841364  | -0.835222 |
| 0.854205  | 0.868922  | 1.        | 0.537698  | 0.846988  | -0.838582 |
| 0.236037  | 0.393688  | 0.537698  | 1.        | 0.27543   | -0.201842 |
| 0.9762    | 0.841364  | 0.846988  | 0.27543   | 1.        | -0.991668 |
| -0.981913 | -0.835222 | -0.838582 | -0.201842 | -0.991668 | 1.        |

```
In[ ]:= k12 = fitiv["BestFitParameters"][[1, 2]];
```

```
In[ ]:= k21 = fitiv["BestFitParameters"][[2, 2]];
```

```
In[ ]:= k13 = fitiv["BestFitParameters"][[3, 2]];
```

```
In[ ]:= k31 = fitiv["BestFitParameters"][[4, 2]];
```

```
In[ ]:= k10 = fitiv["BestFitParameters"][[5, 2]];
```

```
In[ ]:= V1 = fitiv["BestFitParameters"][[6, 2]];
```

```
In[ ]:= ClearAll[modelpkiv2];
```

```
modelpkiv2 =
```

```
First[NDSolve[{Xc'[t] == k0[t] - (k12 + k13 + k10) Xc[t] + k21 Xp1[t] + k31 Xp2[t],
  Xp1'[t] == k12 Xc[t] - k21 Xp1[t],
  Xp2'[t] == k13 Xc[t] - k31 Xp2[t],
  k0'[t] == 0,
  Xc[0] == 0,
  Xp1[0] == 0,
  Xp2[0] == 0,
  k0[0] == kinf, WhenEvent[t == ivduration, k0[t] -> 0.]}],
{Xc, Xp1, Xp2, k0}, {t, 0, 100000}, MaxSteps -> 100000, PrecisionGoal -> ∞];
```

```
In[ ]:= auc = NIntegrate[(Xc[t] / V1) /. modelpkiv2, {t, 0, 100 000}]
```

```
Out[ ]:= 34.0528
```

```
In[ ]:= aumc = NIntegrate[(t Xc[t] / V1) /. modelpkiv2, {t, 0, 100 000}]
```

```
Out[ ]:= 6497.73
```

```
In[ ]:= cl = k10 V1
```

```
Out[ ]:= 0.293661
```

```
In[ ]:= vssnc = (aumc / auc - ivduration / 2) cl
```

```
Out[ ]:= 55.8876
```

```
In[ ]:= thalfexp =
```

```
0.693 / ((Log[Xc[Max[tt]] / V1] - Log[Xc[1.2 Max[tt]] / V1]) / (1.2 Max[tt] - Max[tt])) /.  
modelpkiv2
```

```
Out[ ]:= 214.006
```

```
In[ ]:= plotfit2 = LogPlot[(Xc[t] / V1) /. modelpkiv2, {t, 0, 1.1 Max[tt]},  
PlotRange -> {{0, 1.1 Max[tt]}, {0.5 Min[ct], 1.2 Max[ct]}},  
Frame -> True, FrameStyle -> Directive[Black, 14, Thickness[0.003]],  
LabelStyle -> (FontFamily -> "Arial"), FrameLabel -> {"time, min", "ug/mL"}];
```

```
In[ ]:= Show[plotfit2, plotfit1]
```

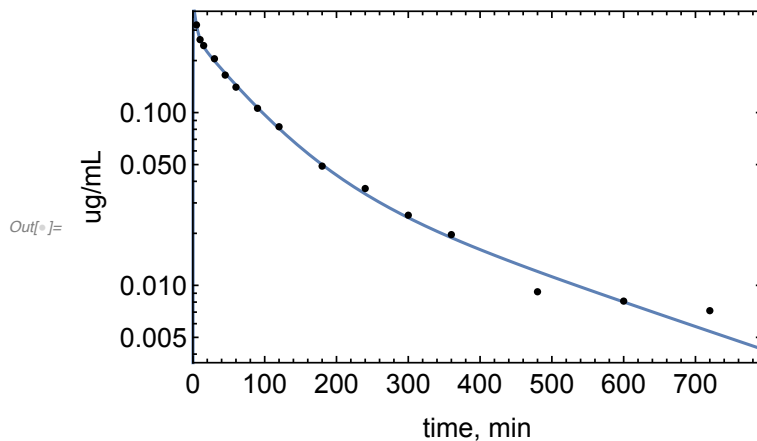

```
In[ ]:= plotfit3 = ListPlot[ctt];  
plotfit4 = Plot[(Xc[t] / V1) /. modelpkiv2,  
{t, 0, 1.1 Max[tt]}, PlotRange -> {{0, 1.1 Max[tt]}, {0, 1.2 Max[ct]}},  
Frame -> True, FrameStyle -> Directive[Black, 14, Thickness[0.003]],  
LabelStyle -> (FontFamily -> "Arial"), FrameLabel -> {"time, min", "ug/mL"}];
```

```
In[ ]:= Show[plotfit4, plotfit3]
```

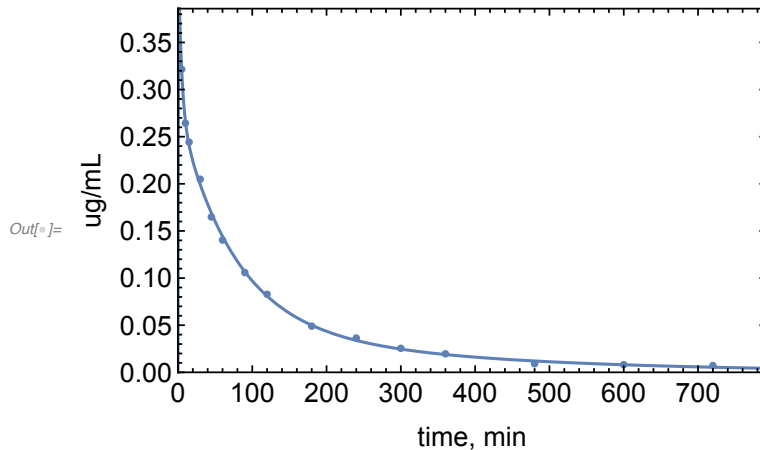

## Physiological Parameters

### Plasma and Blood

```
ln[*]:= {hemat, phiw, php, phbc, fiwbc, taplbc, fnlbc, fnplbc, fnlp, fnplp, qc, vtab, vtvb} =
        {0.45, 7., 7.4, 7.22, 0.603, 0.5, 0.0017, 0.0029, 0.0023, 0.0013, 5.69, 1.89, 3.78};
```

### Adipose

```
ln[*]:= {fiwad, fewad, fnlad, fnplad, r1ad, taplad, qad, vtad, fplad, r2ad} =
        {0.017, 0.135, 0.853, 0.0016, 0.049, 0.4, 0.284, 12.46, 0.002, 0.021952};
```

### Bone

```
ln[*]:= {fiwbone, fewbone, fnlbone, fnplbone, r1bone, taplbone, qbone, vtbone, fplbone,
        r2bone} = {0.364, 0.1, 0.0174, 0.0016, 0.1, 0.67, 0.284, 10.5, 0.002873, 0.0448};
```

### Brain

```
ln[*]:= {fiwbrain, fewbrain, fnlbrain, fnplbrain,
        r1brain, taplbrain, qbrain, vtbrain, fplbrain, r2brain} =
        {0.62, 0.162, 0.0391, 0.0015, 0.048, 0.4, 0.683, 1.4, 0.0019, 0.021504};
```

### Gut

```
ln[*]:= {fiwgut, fewgut, fnlgut, fnplgut, r1gut, taplgut, qgut, vtgut, fplgut, r2gut} =
        {0.475, 0.282, 0.0375, 0.0124, 0.158, 2.41, 1.08, 1.2, 0.01481, 0.070784};
```

### Heart

```
ln[*]:= {fiwheart, fewheart, fnlheart, fnplheart,
        r1heart, taplheart, qheart, vtheart, fplheart, r2heart} =
        {0.456, 0.32, 0.0135, 0.0106, 0.157, 2.25, 0.228, 0.33, 0.01285, 0.070336};
```

### Kidney

```
ln[*]:= {fiwkid, fewkid, fnlkid, fnplkid, r1kid, taplkid, qkid, vtkid, fplkid, r2kid} =
        {0.483, 0.273, 0.0121, 0.024, 0.13, 5.03, 1.081, 0.31, 0.02903, 0.05824};
```



## Liver

```
ln[*]:= {fiwliver, fewliver, fnlliver, fnplliver,
         rlliver, taplliver, qliver, vtliver, fplliver, r2liver} =
         {0.573, 0.161, 0.0135, 0.0238, 0.086, 4.56, 1.451, 1.82, 0.02836, 0.038528};
```

## Lung

```
ln[*]:= {fiwlung, fewlung, fnllung, fnpllung,
         rllung, tapllung, qlung, vtlung, fpllung, r2lung} =
         {0.446, 0.336, 0.0215, 0.0123, 0.212, 3.91, 5.69, 0.53, 0.01621, 0.094976};
```

## Muscle

```
ln[*]:= {fiwmus, fewmus, fnlmus, fnplmus, rlmus, taplmus, qmus, vtms, fplmus, r2mus} =
         {0.63, 0.079, 0.022, 0.0078, 0.064, 1.53, 0.967, 28., 0.00933, 0.028672};
```

## Rest of Body

```
ln[*]:= {fiwrob, fewrob, fnlrob, fnplrob, r1rob, taplrob, qrob, vtrob, fplrob, r2rob} =
         {0.63, 0.079, 0.022, 0.0078, 0.064, 1.53, 0.427, 5., 0.00933, 0.028672};
```

## Skin

```
ln[*]:= {fiwskin, fewskin, fnlskin, fnplskin,
         rlskin, taplskin, qskin, vtskin, fplskin, r2skin} =
         {0.291, 0.382, 0.0603, 0.0044, 0.277, 1.32, 0.285, 3.15, 0.00572, 0.124096};
```

## Spleen

```
ln[*]:= {fiwspleen, fewspleen, fnlspleen, fnplspleen,
         rlspleen, taplspleen, qspleen, vtspleen, fplspleen, r2spleen} =
         {0.579, 0.207, 0.0071, 0.0107, 0.097, 3.18, 0.171, 0.17, 0.01388, 0.043456};
```

## pH partitioning parameters

```
ln[*]:= X = 1 + 10 ^ (pkab - phiw) + 10 ^ (phiw - pkaa);
         Y = 1 + 10 ^ (pkab - php) + 10 ^ (php - pkaa);
```

## Clearance is set to the experimental value

```
ln[*]:= eh = cl / (qliver bp)
```

```
Out[*]:= 0.28505
```

```
ln[*]:= qliver
```

```
Out[*]:= 1.451
```

## Calculate Rodgers Kps for acids and neutrals

```
In[*]:= kpad = (X fiwad / Y + fewad + (dvo fnlad + (0.3 dvo + 0.7) fnplad) / Y +
  (1 / fup - 1 - (dvo fnlp + (0.3 dvo + 0.7) fnplp) / Y) rlad) fup
```

```
Out[*]:= 4.16274
```

```
In[*]:= kpbone = (X fiwbone / Y + fewbone + (pow fnlbone + (0.3 pow + 0.7) fnplbone) / Y +
  ((1 / fup - 1 - (pow fnlp + (0.3 pow + 0.7) fnplp) / Y) rlbone)) fup
```

```
Out[*]:= 0.93797
```

```
In[*]:= kpbraint = (X fiwbraint / Y + fewbraint + (pow fnlbraint + (0.3 pow + 0.7) fnplbraint) / Y +
  ((1 / fup - 1 - (pow fnlp + (0.3 pow + 0.7) fnplp) / Y) rlbraint)) fup
```

```
Out[*]:= 1.9205
```

```
In[*]:= kpgut = (X fiwgut / Y + fewgut + (pow fnlgut + (0.3 pow + 0.7) fnplgut) / Y +
  ((1 / fup - 1 - (pow fnlp + (0.3 pow + 0.7) fnplp) / Y) rlgut)) fup
```

```
Out[*]:= 2.09014
```

```
In[*]:= kpheart = (X fiwheart / Y + fewheart + (pow fnlheart + (0.3 pow + 0.7) fnplheart) / Y +
  ((1 / fup - 1 - (pow fnlp + (0.3 pow + 0.7) fnplp) / Y) rlheart)) fup
```

```
Out[*]:= 0.940793
```

```
In[*]:= kpkid = (X fiwkid / Y + fewkid + (pow fnlkid + (0.3 pow + 0.7) fnplkid) / Y +
  ((1 / fup - 1 - (pow fnlp + (0.3 pow + 0.7) fnplp) / Y) rlkid)) fup
```

```
Out[*]:= 1.04048
```

```
In[*]:= kpliver = (X fiwliver / Y + fewliver + (pow fnlliver + (0.3 pow + 0.7) fnplliver) / Y +
  ((1 / fup - 1 - (pow fnlp + (0.3 pow + 0.7) fnplp) / Y) rlliver)) fup
```

```
Out[*]:= 1.06571
```

```
In[*]:= kplung = (X fiwlung / Y + fewlung + (pow fnllung + (0.3 pow + 0.7) fnpllung) / Y +
  ((1 / fup - 1 - (pow fnlp + (0.3 pow + 0.7) fnplp) / Y) rllung)) fup
```

```
Out[*]:= 1.38567
```

```
In[*]:= kpmus = (X fiwmus / Y + fewmus + (pow fnlmus + (0.3 pow + 0.7) fnplmus) / Y +
  ((1 / fup - 1 - (pow fnlp + (0.3 pow + 0.7) fnplp) / Y) rlmus)) fup
```

```
Out[*]:= 1.21938
```

```
In[*]:= kprob = (X fiwrob / Y + fewrob + (pow fnlrob + (0.3 pow + 0.7) fnplrob) / Y +
  ((1 / fup - 1 - (pow fnlp + (0.3 pow + 0.7) fnplp) / Y) r1rob)) fup
```

```
Out[*]:= 1.21938
```

```
In[*]:= kpskin = (X fiwskin / Y + fewskin + (pow fnlskin + (0.3 pow + 0.7) fnplspleen) / Y +
  ((1 / fup - 1 - (pow fnlp + (0.3 pow + 0.7) fnplp) / Y) r1skin)) fup
```

```
Out[*]= 3.14181
```

```
In[*]:= kpspleen = (X fiwspleen / Y + fewspleen + (pow fnlspleen + (0.3 pow + 0.7) fnplspleen) / Y +
  ((1 / fup - 1 - (pow fnlp + (0.3 pow + 0.7) fnplp) / Y) r1spleen)) fup
```

```
Out[*]= 0.592745
```

```
In[*]:= vssrod = kpad vtad + kpbone vtbone + kpbbrain vtbrain + kpgut vtgut +
  kpheart vtheart + kpkid vtkid + kpliver vtliver + kplung vtlung +
  kpmus vtmus + kprob vtrob + kpskin vtskin + kpspleen vtspleen +
  (1 - hemat) (vtab + vtvb) + hemat (vtab + vtvb) (hemat - 1 + bp) / ( hemat)
```

```
Out[*]= 124.483
```

---

## PBPK model

Qc was calculated using the allometric equation:  $Qc = 0.235 * BW^{0.75}$  with a mean BW of 70kg, Unit=L/h  
 V unit: L (human body weight = 70kg)

```

In[ ]:= pbpk1 = NDSolve[{
  Clung'[t] == qc (Cvp[t] bp - Clung[t] / (kplung / bp)) / vtlung,
  Cad'[t] == qad (Cab[t] - Cad[t] / (kpad / bp)) / vtad,
  Cbone'[t] == qbone (Cab[t] - Cbone[t] / (kpbone / bp)) / vtbone,
  Cbrain'[t] == qbrain (Cab[t] - Cbrain[t] / (kpbrain / bp)) / vtbrain,
  Cheart'[t] == qheart (Cab[t] - Cheart[t] / (kpheart / bp)) / vtheart,
  Ckid'[t] == qkid (Cab[t] - Ckid[t] / (kpkid / bp)) / vtkid,
  Cmus'[t] == qmus (Cab[t] - Cmus[t] / (kpmus / bp)) / vtmus,
  Cspleen'[t] == qspleen (Cab[t] - Cspleen[t] / (kpspleen / bp)) / vtspleen,
  Cgut'[t] == qgut (Cab[t] - Cgut[t] / (kpgut / bp)) / vtgut,
  Cskin'[t] == qskin (Cab[t] - Cskin[t] / (kpskin / bp)) / vtskin,
  Crob'[t] == qrob (Cab[t] - Crob[t] / (kprob / bp)) / vtrob,
  Cliver'[t] ==
    ((qliver - qgut - qspleen) Cab[t] + qgut Cgut[t] / (kpgut / bp) + qspleen
      Cspleen[t] / (kpspleen / bp) - qliver Cliver[t] / (kpliver / bp)) / vtliver -
    ((qliver - qgut - qspleen) Cab[t] + qgut Cgut[t] / (kpgut / bp) +
      qspleen Cspleen[t] / (kpspleen / bp)) * eh / vtliver,
  Cab'[t] == (qc (Clung[t] / (kplung / bp) - Cab[t])) / vtab,
  Cvp'[t] bp == (qad Cad[t] / (kpad / bp) + qbone Cbone[t] / (kpbone / bp) +
    qbrain Cbrain[t] / (kpbrain / bp) + qheart Cheart[t] / (kpheart / bp) +
    qkid Ckid[t] / (kpkid / bp) + qmus Cmus[t] / (kpmus / bp) +
    qrob Crob[t] / (kprob / bp) + qliver Cliver[t] / (kpliver / bp) +
    qskin Cskin[t] / (kpskin / bp) + k0[t] - qc Cvp[t] bp) / vtvb,
  k0'[t] == 0,
  k0[0] == kinf, WhenEvent[t == ivduration, k0[t] → 0.],
  Cvp[0] bp == 0, Clung[0] == 0, Cad[0] == 0, Cbone[0] == 0, Cbrain[0] == 0,
  Cheart[0] == 0, Ckid[0] == 0, Cmus[0] == 0, Cliver[0] == 0,
  Cspleen[0] == 0, Cgut[0] == 0, Crob[0] == 0, Cskin[0] == 0, Cab[0] == 0},
  {Cvp, Cab, Cad, Clung, Cbone, Cbrain, Cheart, Ckid, Cmus,
  Cliver, Cspleen, Cgut, Cskin}, {t, 0, 20 Max[tt]}}];

```

---

```

In[ ]:= plot1 = LogPlot[(70. / avgwt Cvp[t]) /. pbpk1, {t, 0, 1.1 Max[tt]}, PlotRange →
  {{0, 1.1 Max[tt]}, {0.5 Min[ct], 1.8 Max[ct]}}, PlotStyle → {Gray, Dashed},
  Frame → True, FrameStyle → Directive[Black, 14, Thickness[0.003]],
  LabelStyle → Directive[Plain, FontFamily → "Arial Unicode MS"],
  FrameLabel → {"time, min", "concentration, µg/mL"}, ImageSize → Medium];

```

```
In[ ]:= Show[plot1, plotfit1]
```

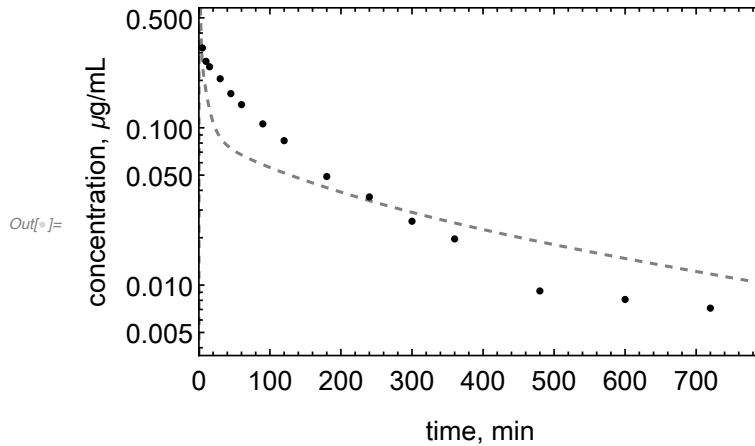

```
In[ ]:= auc1 = NIntegrate[Cvp[t] /. pbpk1, {t, 0, 20 Max[tt]}] [[1]]
```

```
Out[ ]:= 34.0529
```

```
In[ ]:= cl1 = dose / auc1
```

```
Out[ ]:= 0.293661
```

```
In[ ]:= cl / (cl1)
```

```
Out[ ]:= 1.
```

```
In[ ]:= aumc1 = NIntegrate[t Cvp[t] /. pbpk1, {t, 0, 20 Max[tt]}] [[1]]
```

```
Out[ ]:= 14284.3
```

```
In[ ]:= mrt1 = aumc1 / auc1
```

```
Out[ ]:= 419.474
```

```
In[ ]:= mrt1c = mrt1 - (ivduration / 2)
```

```
Out[ ]:= 418.974
```

```
In[ ]:= vss1 = cl1 mrt1
```

```
Out[ ]:= 123.183
```

```
In[ ]:= thalf1 = 0.693 /
```

```
(Log[Cvp[Max[tt]]] - Log[Cvp[1.2 Max[tt]]]) / (1.2 Max[tt] - Max[tt]) /. pbpk1 [[1]]
```

```
Out[ ]:= 382.76
```

```
In[ ]:= ClearAll["kp*"];
```

## Calculate memPBPK Kps

```
In[ ]:= lk1 = (1 - fum) / fum
```

```
Out[ ]:= 0.470588
```

In[\*]:= a = 1383;  
b = 0.096;

$$\begin{aligned} \text{In[*]}:= \text{kpad} = & \text{r1ad} (1 - \text{fup}) + \text{fiwad} \text{fup} \left( \frac{10^{\text{pkab}-7.0} + 10^{7.0-\text{pkaa}} + 1}{10^{\text{pkab}-7.4} + 10^{7.4-\text{pkaa}} + 1} \right) + \\ & \text{fewad} \text{fup} + \text{fplad} \left( \frac{10^{\text{pkab}-7.0} + 10^{7.0-\text{pkaa}} + 1}{10^{\text{pkab}-7.4} + 10^{7.4-\text{pkaa}} + 1} \right) \text{fup a lkl} + \\ & \text{fnlad} \text{fup b} (10^{\wedge} \text{logp}) \left( \frac{1}{10^{\text{pkab}-7.0} + 10^{7.0-\text{pkaa}} + 1} \right) \end{aligned}$$

Out[\*]= 3.72031

$$\begin{aligned} \text{In[*]}:= \text{kpbone} = & \text{r1bone} (1 - \text{fup}) + \text{fiwbone} \text{fup} \left( \frac{10^{\text{pkab}-7.0} + 10^{7.0-\text{pkaa}} + 1}{10^{\text{pkab}-7.4} + 10^{7.4-\text{pkaa}} + 1} \right) + \\ & \text{fewbone} \text{fup} + \text{fplbone} \left( \frac{10^{\text{pkab}-7.0} + 10^{7.0-\text{pkaa}} + 1}{10^{\text{pkab}-7.4} + 10^{7.4-\text{pkaa}} + 1} \right) \text{fup a lkl} + \\ & \text{fnlbone} \text{fup b} (10^{\wedge} \text{logp}) \left( \frac{1}{10^{\text{pkab}-7.0} + 10^{7.0-\text{pkaa}} + 1} \right) \end{aligned}$$

Out[\*]= 0.255474

$$\begin{aligned} \text{In[*]}:= \text{kpbbrain} = & \text{r1brain} (1 - \text{fup}) + \text{fiwbrain} \text{fup} \left( \frac{10^{\text{pkab}-7.0} + 10^{7.0-\text{pkaa}} + 1}{10^{\text{pkab}-7.4} + 10^{7.4-\text{pkaa}} + 1} \right) + \\ & \text{fewbrain} \text{fup} + \text{fplbrain} \left( \frac{10^{\text{pkab}-7.0} + 10^{7.0-\text{pkaa}} + 1}{10^{\text{pkab}-7.4} + 10^{7.4-\text{pkaa}} + 1} \right) \text{fup a lkl} + \\ & \text{fnlbrain} \text{fup b} (10^{\wedge} \text{logp}) \left( \frac{1}{10^{\text{pkab}-7.0} + 10^{7.0-\text{pkaa}} + 1} \right) \end{aligned}$$

Out[\*]= 0.285717

$$\begin{aligned} \text{In[*]}:= \text{kpgut} = & \text{r1gut} (1 - \text{fup}) + \text{fiwgut} \text{fup} \left( \frac{10^{\text{pkab}-7.0} + 10^{7.0-\text{pkaa}} + 1}{10^{\text{pkab}-7.4} + 10^{7.4-\text{pkaa}} + 1} \right) + \\ & \text{fewgut} \text{fup} + \text{fplgut} \left( \frac{10^{\text{pkab}-7.0} + 10^{7.0-\text{pkaa}} + 1}{10^{\text{pkab}-7.4} + 10^{7.4-\text{pkaa}} + 1} \right) \text{fup a lkl} + \\ & \text{fnlgut} \text{fup b} (10^{\wedge} \text{logp}) \left( \frac{1}{10^{\text{pkab}-7.0} + 10^{7.0-\text{pkaa}} + 1} \right) \end{aligned}$$

Out[\*]= 0.691001

$$\begin{aligned} \text{In[ ]:= } \text{kphheart} &= \text{r1heart} (1 - \text{fup}) + \text{fiwheart} \text{fup} \left( \frac{10^{\text{pkab}-7.0} + 10^{7.0-\text{pkaa}} + 1}{10^{\text{pkab}-7.4} + 10^{7.4-\text{pkaa}} + 1} \right) + \\ &\text{fewheart} \text{fup} + \text{fplheart} \left( \frac{10^{\text{pkab}-7.0} + 10^{7.0-\text{pkaa}} + 1}{10^{\text{pkab}-7.4} + 10^{7.4-\text{pkaa}} + 1} \right) \text{fup a lkl} + \\ &\text{fnlheart} \text{fup b} (10^{\wedge} \text{logp}) \left( \frac{1}{10^{\text{pkab}-7.0} + 10^{7.0-\text{pkaa}} + 1} \right) \end{aligned}$$

Out[ ]:= 0.542182

$$\begin{aligned} \text{In[ ]:= } \text{kpkid} &= \text{r1kid} (1 - \text{fup}) + \text{fiwkid} \text{fup} \left( \frac{10^{\text{pkab}-7.0} + 10^{7.0-\text{pkaa}} + 1}{10^{\text{pkab}-7.4} + 10^{7.4-\text{pkaa}} + 1} \right) + \\ &\text{fewkid} \text{fup} + \text{fplkid} \left( \frac{10^{\text{pkab}-7.0} + 10^{7.0-\text{pkaa}} + 1}{10^{\text{pkab}-7.4} + 10^{7.4-\text{pkaa}} + 1} \right) \text{fup a lkl} + \\ &\text{fnlkid} \text{fup b} (10^{\wedge} \text{logp}) \left( \frac{1}{10^{\text{pkab}-7.0} + 10^{7.0-\text{pkaa}} + 1} \right) \end{aligned}$$

Out[ ]:= 0.894334

$$\begin{aligned} \text{In[ ]:= } \text{kpliver} &= \text{r1liver} (1 - \text{fup}) + \text{fiwliver} \text{fup} \left( \frac{10^{\text{pkab}-7.0} + 10^{7.0-\text{pkaa}} + 1}{10^{\text{pkab}-7.4} + 10^{7.4-\text{pkaa}} + 1} \right) + \\ &\text{fewliver} \text{fup} + \text{fplliver} \left( \frac{10^{\text{pkab}-7.0} + 10^{7.0-\text{pkaa}} + 1}{10^{\text{pkab}-7.4} + 10^{7.4-\text{pkaa}} + 1} \right) \text{fup a lkl} + \\ &\text{fnlliver} \text{fup b} (10^{\wedge} \text{logp}) \left( \frac{1}{10^{\text{pkab}-7.0} + 10^{7.0-\text{pkaa}} + 1} \right) \end{aligned}$$

Out[ ]:= 0.841284

$$\begin{aligned} \text{In[ ]:= } \text{kplung} &= \text{r1lung} (1 - \text{fup}) + \text{fiwlung} \text{fup} \left( \frac{10^{\text{pkab}-7.0} + 10^{7.0-\text{pkaa}} + 1}{10^{\text{pkab}-7.4} + 10^{7.4-\text{pkaa}} + 1} \right) + \\ &\text{fewlung} \text{fup} + \text{fpllung} \left( \frac{10^{\text{pkab}-7.0} + 10^{7.0-\text{pkaa}} + 1}{10^{\text{pkab}-7.4} + 10^{7.4-\text{pkaa}} + 1} \right) \text{fup a lkl} + \\ &\text{fnllung} \text{fup b} (10^{\wedge} \text{logp}) \left( \frac{1}{10^{\text{pkab}-7.0} + 10^{7.0-\text{pkaa}} + 1} \right) \end{aligned}$$

Out[ ]:= 0.709332

$$\begin{aligned} \text{In[ ]:= } \text{kpmus} &= \text{r1mus} (1 - \text{fup}) + \text{fiwmus} \text{fup} \left( \frac{10^{\text{pkab}-7.0} + 10^{7.0-\text{pkaa}} + 1}{10^{\text{pkab}-7.4} + 10^{7.4-\text{pkaa}} + 1} \right) + \\ &\text{fewmus} \text{fup} + \text{fplmus} \left( \frac{10^{\text{pkab}-7.0} + 10^{7.0-\text{pkaa}} + 1}{10^{\text{pkab}-7.4} + 10^{7.4-\text{pkaa}} + 1} \right) \text{fup a lkl} + \\ &\text{fnlmus} \text{fup b} (10^{\wedge} \text{logp}) \left( \frac{1}{10^{\text{pkab}-7.0} + 10^{7.0-\text{pkaa}} + 1} \right) \end{aligned}$$

Out[ ]:= 0.402796

$$\begin{aligned} \text{In[*]}:= \text{kprob} = & \text{r1rob} (1 - \text{fup}) + \text{fiwrob} \text{fup} \left( \frac{10^{\text{pkab}-7.0} + 10^{7.0-\text{pkaa}} + 1}{10^{\text{pkab}-7.4} + 10^{7.4-\text{pkaa}} + 1} \right) + \\ & \text{fewrob} \text{fup} + \text{fplrob} \left( \frac{10^{\text{pkab}-7.0} + 10^{7.0-\text{pkaa}} + 1}{10^{\text{pkab}-7.4} + 10^{7.4-\text{pkaa}} + 1} \right) \text{fup a lkl} + \\ & \text{fnlrob} \text{fup b} (10^{\wedge} \text{logp}) \left( \frac{1}{10^{\text{pkab}-7.0} + 10^{7.0-\text{pkaa}} + 1} \right) \end{aligned}$$

Out[\*]= 0.402796

$$\begin{aligned} \text{In[*]}:= \text{kpskin} = & \text{r1skin} (1 - \text{fup}) + \text{fiwskin} \text{fup} \left( \frac{10^{\text{pkab}-7.0} + 10^{7.0-\text{pkaa}} + 1}{10^{\text{pkab}-7.4} + 10^{7.4-\text{pkaa}} + 1} \right) + \\ & \text{fewskin} \text{fup} + \text{fplskin} \left( \frac{10^{\text{pkab}-7.0} + 10^{7.0-\text{pkaa}} + 1}{10^{\text{pkab}-7.4} + 10^{7.4-\text{pkaa}} + 1} \right) \text{fup a lkl} + \\ & \text{fnlskin} \text{fup b} (10^{\wedge} \text{logp}) \left( \frac{1}{10^{\text{pkab}-7.0} + 10^{7.0-\text{pkaa}} + 1} \right) \end{aligned}$$

Out[\*]= 0.683206

$$\begin{aligned} \text{In[*]}:= \text{kpspleen} = & \text{r1spleen} (1 - \text{fup}) + \text{fiwspleen} \text{fup} \left( \frac{10^{\text{pkab}-7.0} + 10^{7.0-\text{pkaa}} + 1}{10^{\text{pkab}-7.4} + 10^{7.4-\text{pkaa}} + 1} \right) + \\ & \text{fewspleen} \text{fup} + \text{fplspleen} \left( \frac{10^{\text{pkab}-7.0} + 10^{7.0-\text{pkaa}} + 1}{10^{\text{pkab}-7.4} + 10^{7.4-\text{pkaa}} + 1} \right) \text{fup a lkl} + \\ & \text{fnlspleen} \text{fup b} (10^{\wedge} \text{logp}) \left( \frac{1}{10^{\text{pkab}-7.0} + 10^{7.0-\text{pkaa}} + 1} \right) \end{aligned}$$

Out[\*]= 0.482182

$$\begin{aligned} \text{In[*]}:= \text{vssfum} = & \text{kpad} \text{vtad} + \text{kpbone} \text{vtbone} + \text{kpbrian} \text{vtbrian} + \text{kpgut} \text{vtgut} + \\ & \text{kpheart} \text{vtheart} + \text{kpkid} \text{vtkid} + \text{kpliver} \text{vtliver} + \text{kplung} \text{vtlung} + \\ & \text{kpmus} \text{vtmus} + \text{kprob} \text{vtrob} + \text{kpskin} \text{vtskin} + \text{kpspleen} \text{vtspleen} + \\ & (1 - \text{hemat}) (\text{vtab} + \text{vtvb}) + \text{hemat} (\text{vtab} + \text{vtvb}) (\text{hemat} - 1 + \text{bp}) / (\text{hemat}) \end{aligned}$$

Out[\*]= 72.1821

---



## PBPK model 2

Qc was calculated using the allometric equation:  $Qc = 0.235 * BW^{0.75}$  with a mean BW of 70kg, Unit=L/h  
 V unit: L (human body weight = 70kg)

```
In[6]:= pbpk2 = NDSolve[{
  Clung'[t] == qc (Cvp[t] bp - Clung[t] / (kplung / bp)) / vtlung,
  Cad'[t] == qad (Cab[t] - Cad[t] / (kpad / bp)) / vtad,
  Cbone'[t] == qbone (Cab[t] - Cbone[t] / (kpbone / bp)) / vtbone,
  Cbrain'[t] == qbrain (Cab[t] - Cbrain[t] / (kpbrain / bp)) / vtbrain,
  Cheart'[t] == qheart (Cab[t] - Cheart[t] / (kpheart / bp)) / vtheart,
  Ckid'[t] == qkid (Cab[t] - Ckid[t] / (kpkid / bp)) / vtkid,
  Cmus'[t] == qmus (Cab[t] - Cmus[t] / (kpmus / bp)) / vtmus,
  Cspleen'[t] == qspleen (Cab[t] - Cspleen[t] / (kpspleen / bp)) / vtspleen,
  Cgut'[t] == qgut (Cab[t] - Cgut[t] / (kpgut / bp)) / vtgut,
  Cskin'[t] == qskin (Cab[t] - Cskin[t] / (kpskin / bp)) / vtskin,
  Crob'[t] == qrob (Cab[t] - Crob[t] / (kprob / bp)) / vtrob,
  Cliver'[t] ==
    ((qliver - qgut - qspleen) Cab[t] + qgut Cgut[t] / (kpgut / bp) + qspleen
      Cspleen[t] / (kpspleen / bp) - qliver Cliver[t] / (kpliver / bp)) / vtliver -
    ((qliver - qgut - qspleen) Cab[t] + qgut Cgut[t] / (kpgut / bp) +
      qspleen Cspleen[t] / (kpspleen / bp)) * eh / vtliver,
  Cab'[t] == (qc (Clung[t] / (kplung / bp) - Cab[t])) / vtab,
  Cvp'[t] bp == (qad Cad[t] / (kpad / bp) + qbone Cbone[t] / (kpbone / bp) +
    qbrain Cbrain[t] / (kpbrain / bp) + qheart Cheart[t] / (kpheart / bp) +
    qkid Ckid[t] / (kpkid / bp) + qmus Cmus[t] / (kpmus / bp) +
    qrob Crob[t] / (kprob / bp) + qliver Cliver[t] / (kpliver / bp) +
    qskin Cskin[t] / (kpskin / bp) + k0[t] - qc Cvp[t] bp) / vtvb,
  k0'[t] == 0,
  k0[0] == kinf, WhenEvent[t == ivduration, k0[t] → 0.],
  Cvp[0] bp == 0, Clung[0] == 0, Cad[0] == 0, Cbone[0] == 0, Cbrain[0] == 0,
  Cheart[0] == 0, Ckid[0] == 0, Cmus[0] == 0, Cliver[0] == 0,
  Cspleen[0] == 0, Cgut[0] == 0, Crob[0] == 0, Cskin[0] == 0, Cab[0] == 0},
  {Cvp, Cab, Cad, Clung, Cbone, Cbrain, Cheart, Ckid, Cmus,
  Cliver, Cspleen, Cgut, Cskin}, {t, 0, 20 Max[tt]}];
```

```
In[7]:= auc2 = NIntegrate[Cvp[t] /. pbpk2, {t, 0, 20 Max[tt]}][[1]]
```

```
Out[7]= 34.0529
```

```
In[8]:= cl2 = dose / auc2
```

```
Out[8]= 0.293661
```

```
In[ ]:= cl / (cl2)
```

```
Out[ ]:= 1.
```

```
In[ ]:= aumc2 = NIntegrate[t Cvp[t] /. pbpk2, {t, 0, 20 Max[tt]}] [[1]]
```

```
Out[ ]:= 8292.1
```

```
In[ ]:= mrt2 = aumc2 / auc2
```

```
Out[ ]:= 243.507
```

```
In[ ]:= mrt2c = mrt2 - (ivduration / 2)
```

```
Out[ ]:= 243.007
```

```
In[ ]:= vss2 = cl2 mrt2c
```

```
Out[ ]:= 71.3616
```

```
In[ ]:= thalf2 = 0.693 /
```

```
((Log[Cvp[Max[tt]]] - Log[Cvp[1.2 Max[tt]]) / (1.2 Max[tt] - Max[tt])) /. pbpk2[[1]]
```

```
Out[ ]:= 296.811
```

```
In[ ]:= plot2 = LogPlot[(70. / avgwt Cvp[t]) /. pbpk2, {t, 0, 1.1 Max[tt]},
  PlotRange -> {{0, 1.1 Max[tt]}, {0.5 Min[ct], 1.8 Max[ct]}}, PlotStyle -> {Gray},
  Frame -> True, FrameStyle -> Directive[Black, 14, Thickness[0.003]],
  LabelStyle -> (FontFamily -> "Arial"),
  FrameLabel -> {"time, min", "concentration, ug/mL"}];
```

```
In[ ]:= Show[plot2, plot2, plotfit1]
```

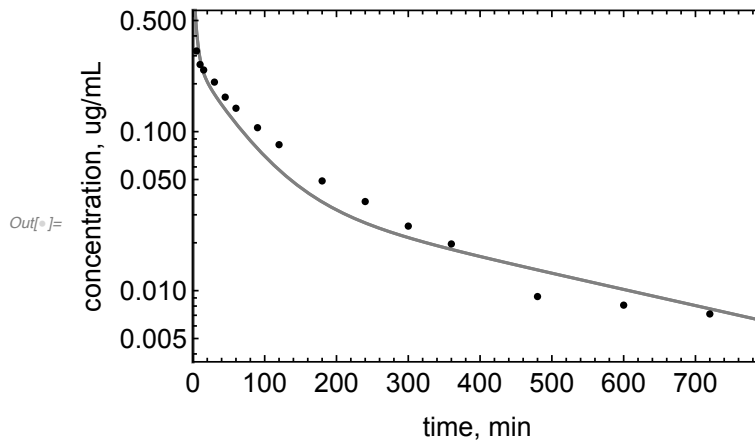


---

## PBPK model 3 - Permeability and perfusion limited

```
In[ ]:= ClearAll[kp, kn, phiw, php, qc]
```

---

## Physiological Parameters

```
In[*]:= {phiw, php, qc, vtab, vtvb, ppcpmw, phcp, phcp2, ecfactor, aconst, bconst, phsl,
          kendoa, kendob, paq, ppara} = {7.1, 7.4, 5.691, 1.527, 3.055, 0.00071934,
          0.000102, 0.00102, 1., 1400., 0.1, 10., 19.0546, 0.694, 0.0001, 2. * 10^-7};
```

```
In[*]:= pappsec1 = (paq pappsec - paq ppara) / (paq + ppara - pappsec)
```

```
Out[*]:= 0.0000730104
```

```
In[*]:= bp0 = bp;
```

```
In[*]:= pery = 0.000002;
```

```
In[*]:= bpc = bp - (pery / (pery + pappsec1) fup 0.45);
```

```
In[*]:= If[bpc ≤ 0.55, bp = 0.55001, bp = bpc]
```

```
Out[*]:= 0.709586
```

```
In[*]:= papp = pappsec1 60 / 10
```

```
Out[*]:= 0.000438062
```

```
In[*]:= ppcp = ppcpmw / (mw^0.33)
```

```
Out[*]:= 0.000106576
```

b=blood

e=extracellular space

c=cytosol

n=neutral lipid

p=phospholipid

am=apical membrane

at 1 mg microsomal protein/mL,  $kp=(1-fum)/(fum 0.00072)$  from 1/1390 - Holt et al. 2019

```
In[*]:= kp = aconst (1 - fum) / (fum)
```

```
Out[*]:= 658.824
```

```
In[*]:= kn = bconst pow
```

```
Out[*]:= 141.254
```

## pH partitioning parameters

```
In[*]:= ClearAll[x, y];
```

```
In[*]:= x = 1 + phsl^ (pkab - phiw) + phsl^ (phiw - pkaa);
```

```
y = 1 + phsl^ (pkab - php) + phsl^ (php - pkaa);
```

C1

```
ln[*]:= {q1, r1, r2, v1b, v1e, v1c, v1n, v1p, sa1b, sa1e, sa1n, sa1p} =
  {1.359, 0.78018, 0.349521, 0.405, 3.552, 19.301, 0.79,
  0.1933, 21582.9, 323743., 947964., 6.03951 * 10^6};
```

```
ln[*]:= re = r1 anflag + r2 bflag;
```

```
ln[*]:= fue1 = 1 / (1 + re (1 - fup) / fup);
```

---

adp

```
ln[*]:= {qadp, r1, r2, vadpb, vadpe, vadpc, vadpn, vadpp, saadpb, saadpe, saadpn, saadpp} =
  {0.284, 0.362963, 0.162607, 0.18, 1.682, 0.212, 10.624,
  0.0159, 9575.74, 143636., 2.12488 * 10^6, 498400.};
```

```
ln[*]:= re = r1 anflag + r2 bflag;
```

```
ln[*]:= fueadp = 1 / (1 + re (1 - fup) / fup);
```

---

C2

```
ln[*]:= {q2, r1, r2, v2b, v2e, v2c, v2n, v2p, sa2b, sa2e, sa2n, sa2p} = {0.391, 1., 0.448,
  0.104, 1.175, 4.277, 0.201, 0.015, 5534.72, 83020.8, 240828., 470000.};
```

```
ln[*]:= re = r1 anflag + r2 bflag;
```

```
ln[*]:= fue2 = 1 / (1 + re (1 - fup) / fup);
```

---

C3

```
ln[*]:= {q3, r1, r2, v3b, v3e, v3c, v3n, v3p, sa3b, sa3e, sa3n, sa3p} = {0.335, 0.490625,
  0.2198, 0.094, 0.506, 0.72, 0.018, 0.0134, 5000., 75000., 21576.5, 418700.};
```

```
ln[*]:= re = r1 anflag + r2 bflag;
```

```
ln[*]:= fue3 = 1 / (1 + re (1 - fup) / fup);
```

---

lun

```
ln[*]:= {qlun, r1, r2, vlunb, vlune, vlunc, vlunn, vlunp, salunb, salune, salunn, salunp} =
  {5.691, 0.630952, 0.282667, 0.023, 0.178, 0.236,
  0.01, 0.0052, 1226.85, 18402.8, 12109.4, 162975.};
```

```
ln[*]:= re = r1 anflag + r2 bflag;
```

```
ln[*]:= fuelun = 1 / (1 + re (1 - fup) / fup);
```

---

mes

```
ln[*]:= {qmes, r1, r2, vmesb, vmese, vmesc, vmesn, vmesp, samesb, same se, samesn, same sp} =
  {0.972, 0.560284, 0.251007, 0.05, 0.305, 0.513,
  0.038, 0.0107, 2640., 39600., 45385.9, 334800.};
```

```
ln[*]:= re = r1 anflag + r2 bflag;
```

```
ln[*]:= fuemes = 1 / (1 + re (1 - fup) / fup);
```

---

## C4

```
ln[*]:= {q4, r1, r2, v4b, v4e, v4c, v4n, v4p, sa4b, sa4e, sa4n, sa4p} = {1.188, 0.47619,
    0.213333, 0.084, 0.426, 0.753, 0.011, 0.03, 4476.85, 67152.8, 13665.6, 936000.};
```

```
ln[*]:= re = r1 anflag + r2 bflag;
```

```
ln[*]:= fue4 = 1 / (1 + re (1 - fup) / fup);
```

---

## muc

```
ln[*]:= {qmuc, r1, r2, vmucb, vmuce, vmucc, vmucn, vmucp, samucb, samuce, samucn, samucp} =
    {0.108, 0.560284, 0.251007, 0.002, 0.034, 0.057,
    0.004, 0.0012, 97.7778, 1466.67, 5042.88, 37200.};
```

```
ln[*]:= re = r1 anflag + r2 bflag;
```

```
ln[*]:= fuemuc = 1 / (1 + re (1 - fup) / fup);
```

---

## spl

```
ln[*]:= {qspl, r1, r2, vsplb, vsple, vsplc, vspln, vsplp, sasplb, sasple, saspln, sasplp} =
    {0.171, 0.468599, 0.209932, 0.009, 0.035, 0.098,
    0.001, 0.0015, 462.778, 6941.67, 1011.84, 45475.};
```

```
ln[*]:= re = r1 anflag + r2 bflag;
```

```
ln[*]:= fuespl = 1 / (1 + re (1 - fup) / fup);
```

---

## liv

```
ln[*]:= {qliv, r1, r2, vlivb, vlive, vlivc, vlivn, vlivp, salivb, salive, salivn, salivp} =
    {1.451, 0.534161, 0.239304, 0.079, 0.293, 1.043,
    0.016, 0.0347, 4212.96, 500000., 19088.2, 1.0829 * 10^6};
```

```
ln[*]:= re = r1 anflag + r2 bflag;
```

```
ln[*]:= fueliv = 1 / (1 + re (1 - fup) / fup);
```

---

## brn

```
ln[*]:= {qbrn, r1, r2, vbrnb, vbrne, vbrnc, vbrnn, vbrnp, sabrnb, sabrne,
    sabrnn, sabrnp, vbrnam} = {0.683, 0.296296, 0.132741, 0.058, 0.227,
    0.868, 0.054, 0.0017, 3111.11, 46666.7, 65184., 52500., 0.0000653333};
```

```
ln[*]:= re = r1 anflag + r2 bflag;
```

```
ln[*]:= fuebrn = 1 / (1 + re (1 - fup) / fup);
```

---

## Model

rq - net rate blood flow

clbe - net clearance blood to ecf

cleb - net clearance ecf to blood

clcc - net clearance ecf to cytosol  
clce - net clearance cytosol to ecf  
clcn - net clearance cytosol to neutral lipids  
clcp - net clearance cytosol to phospholipids  
clnc - net clearance neutral lipids to cytosol  
clpc - net clearance phospholipids to cytosol  
clu1 - hypothetical pinocytosis  
clu2 - uptake transporter  
clu3 - liver uptake transporter  
cle1 - efflux transporter

```
In[ ]:= (*ClearAll["Global`*"];*)
```

```
In[ ]:= tist = {"1", "adp", "2", "3", "\lun", "mes", "4", "muc", "spl", "liv", "brn"};
```

```
In[ ]:= cpt = {ppcp, ppcp, phcp, ppcp, ppcp, ppcp, phcp, phcp, phcp, phcp, phcp2, 0.}
```

```
Out[ ]:= {0.000106576, 0.000106576, 0.000102, 0.000106576, 0.000106576,  
0.000106576, 0.000102, 0.000102, 0.000102, 0.000102, 0.000102, 0.00102, 0.}
```

```
In[ ]:= i = 1;
```

```

In[*]:= While[i ≤ 11,
  tis = tist[[i]];

  Evaluate[ToExpression["rq" <> tis]] = Evaluate[ToExpression["q" <> tis]] ×
    (Cab[t] - Evaluate[ToExpression["C" <> tis <> "b"]][t]);

  Evaluate[ToExpression["clbe" <> tis]] =
    fup cpt[[i]] × Evaluate[ToExpression["sa" <> tis <> "b"]] / bp +
    fup papp Evaluate[ToExpression["sa" <> tis <> "b"]] / bp;

  Evaluate[ToExpression["cleb" <> tis]] = Evaluate[ToExpression["fue" <> tis]] × cpt[[i]] ×
    Evaluate[ToExpression["sa" <> tis <> "b"]] + Evaluate[ToExpression["fue" <> tis]]
    papp Evaluate[ToExpression["sa" <> tis <> "b"]];

  Evaluate[ToExpression["clcc" <> tis]] = Evaluate[ToExpression["fue" <> tis]]
    2 papp Evaluate[ToExpression["sa" <> tis <> "e"]] +
    clu1 + Evaluate[ToExpression["fue" <> tis]] clu2;

  Evaluate[ToExpression["clce" <> tis]] =
    (y / x) 2 papp Evaluate[ToExpression["sa" <> tis <> "e"]];

  Evaluate[ToExpression["clcn" <> tis]] =
    (1 / x) × 4 papp Evaluate[ToExpression["sa" <> tis <> "n"]];

  Evaluate[ToExpression["clcp" <> tis]] =
    4 papp Evaluate[ToExpression["sa" <> tis <> "p"]];

  Evaluate[ToExpression["clnc" <> tis]] =
    4 papp Evaluate[ToExpression["sa" <> tis <> "n"]] / kn;

  Evaluate[ToExpression["clpc" <> tis]] =
    4 papp Evaluate[ToExpression["sa" <> tis <> "p"]] / kp;
  i++];

```

---

```

In[*]:= clu1 = 0.0; clu2 = 0.; clu3 = 0.;

```

---

## Fix the non-normal net clearances

liver discontinuities allow plasma protein diffusion

```

In[*]:= clbeliv = phcp2 salivb / bp + fup papp salivb / bp
Out[*]:= 6.14568

```

```
In[ ]:= clebliv = phcp2 salivb + fueliv papp salivb
```

```
Out[ ]:= 4.53699
```

liver to include uptake transport

```
In[ ]:= clecliv = fueliv 2 papp salive + clu1 + fueliv clu2 + fueliv clu3;
```

brain apical membrane clearances

```
In[ ]:= clbabrnb = fup 4 papp sabrnb / bp;
```

```
clabbrnb = (4 papp sabrnb) / kp;
```

```
claebrnb = (2 papp sabrnb) / (3 kp);
```

```
cleabrnb = fuebrnb (2 papp sabrnb) / 3;
```

```
In[ ]:= ClearAll[clenet, clbnet, clint2, clint]
```

Calculate unbound intrinsic clearance

```
In[ ]:= clh = (1 - fe) cl
```

```
Out[ ]:= 0.293661
```

```
In[ ]:= clenet = clecliv clint2 / (clceliv + clint2)
```

```
Out[ ]:= 
$$\frac{56.9131 \text{ clint2}}{421.636 + \text{clint2}}$$

```

```
In[ ]:= clbnet = clbeliv clenet / (clebliv + clenet)
```

```
Out[ ]:= 
$$\frac{349.77 \text{ clint2}}{(421.636 + \text{clint2}) \times \left( 4.53699 + \frac{56.9131 \text{ clint2}}{421.636 + \text{clint2}} \right)}$$

```

```
In[ ]:= soln = Solve[clh / bp == qliver clbnet / (qliver + clbnet), clint2] [[1]]
```

```
Out[ ]:= {clint2 -> 3.52516}
```

```
In[ ]:= clint = clint2 /. soln
```

```
Out[ ]:= 3.52516
```

```
In[ ]:= ClearAll[rqlun, rqliv];
```

```
In[ ]:= rqlun = qlun (Cvb[t] - Clunb[t]);
```

```
In[ ]:= rqliv = (qliv - qmes - qmuc - qspl) Cab[t] +  
qmes Cmesb[t] + qmuc Cmucb[t] + qspl Csplb[t] - qliv Clivb[t];
```

## Binding to acidic groups on endothelial cells - kd in M

```
In[ ]:= kon = 1000.;
```

```
In[ ]:= bp2 = If[(bp0 - fup 0.45) < 0.55, 0.55001, (bp0 - fup 0.45)]
```

```
Out[ ]:= 0.694475
```



In[ ]:= **kery = (bp2 - 0.55) / (0.45 fup)**

Out[ ]:= 9.30596

In[ ]:= **ka = kendoa kery ^ kendob**

Out[ ]:= 89.6025

In[ ]:= **koff = kon / ka**

Out[ ]:= 11.1604

In[ ]:= **Cneg = 1;**

In[ ]:= **pbpk3 = NDSolve[{**

**C1b'[t] == (rq1 - C1b[t] clbe1 + C1e[t] cleb1) / v1b,**

**C1e'[t] == (C1b[t] clbe1 - C1e[t] cleb1 - C1e[t] clec1 + C1c[t] clce1) / v1e,**

**C1c'[t] == (C1e[t] clec1 - C1c[t] clce1 -**

**C1c[t] clcn1 - C1c[t] clcp1 + C1n[t] clnc1 + C1p[t] clpc1) / v1c,**

**C1n'[t] == (C1c[t] clcn1 - C1n[t] clnc1) / v1n,**

**C1p'[t] == (C1c[t] clcp1 - C1p[t] clpc1) / v1p,**

**Cadpb'[t] == (rqadp - Cadpb[t] clbeadp + Cadpe[t] clebadp) / vadpb,**

**Cadpe'[t] == (Cadpb[t] clbeadp -**

**Cadpe[t] clebadp - Cadpe[t] clecadp + Cadpc[t] clceadp) / vadpe,**

**Cadpc'[t] == (Cadpe[t] clecadp - Cadpc[t] clceadp - Cadpc[t] clcnadp -**

**Cadpc[t] clcpadp + Cadpn[t] clncadp + Cadpp[t] clpcadp) / vadpc,**

**Cadpn'[t] == (Cadpc[t] clcnadp - Cadpn[t] clncadp) / vadpn,**

**Cadpp'[t] == (Cadpc[t] clcpadp - Cadpp[t] clpcadp) / vadpp,**

**C2b'[t] == (rq2 - C2b[t] clbe2 + C2e[t] cleb2) / v2b,**

**C2e'[t] == (C2b[t] clbe2 - C2e[t] cleb2 - C2e[t] clec2 + C2c[t] clce2) / v2e,**

**C2c'[t] == (C2e[t] clec2 - C2c[t] clce2 -**

**C2c[t] clcn2 - C2c[t] clcp2 + C2n[t] clnc2 + C2p[t] clpc2) / v2c,**

**C2n'[t] == (C2c[t] clcn2 - C2n[t] clnc2) / v2n,**

**C2p'[t] == (C2c[t] clcp2 - C2p[t] clpc2) / v2p,**

**C3b'[t] == (rq3 - C3b[t] clbe3 + C3e[t] cleb3) / v3b,**

**C3e'[t] == (C3b[t] clbe3 - C3e[t] cleb3 - C3e[t] clec3 + C3c[t] clce3) / v3e,**

**C3c'[t] == (C3e[t] clec3 - C3c[t] clce3 -**

**C3c[t] clcn3 - C3c[t] clcp3 + C3n[t] clnc3 + C3p[t] clpc3) / v3c,**

**C3n'[t] == (C3c[t] clcn3 - C3n[t] clnc3) / v3n,**

**C3p'[t] == (C3c[t] clcp3 - C3p[t] clpc3) / v3p,**

**Clunb'[t] == (rqlun - Clunb[t] clbelun + Clune[t] cleblun) / vlunb,**

**Clune'[t] == (Clunb[t] clbelun -**

**Clune[t] cleblun - Clunc[t] clcelun) / vlune,**

$$\begin{aligned} \text{Clunc}'[t] &= (\text{Clunc}[t] \text{ cleclun} - \text{Clunc}[t] \text{ clcelun} - \text{Clunc}[t] \text{ clcnlun} - \\ &\quad \text{Clunc}[t] \text{ clcplun} + \text{Clunn}[t] \text{ clnclun} + \text{Clunp}[t] \text{ clpclun}) / \text{vlunc}, \\ \text{Clunn}'[t] &= (\text{Clunc}[t] \text{ clcnlun} - \text{Clunn}[t] \text{ clnclun}) / \text{vlunn}, \\ \text{Clunp}'[t] &= (\text{Clunc}[t] \text{ clcplun} - \text{Clunp}[t] \text{ clpclun}) / \text{vlunp}, \end{aligned}$$

$$\begin{aligned} \text{Cmesb}'[t] &= (\text{rqmes} - \text{Cmesb}[t] \text{ clbemes} + \text{Cmese}[t] \text{ clebmes}) / \text{vmesb}, \\ \text{Cmese}'[t] &= (\text{Cmesb}[t] \text{ clbemes} - \\ &\quad \text{Cmese}[t] \text{ clebmes} - \text{Cmese}[t] \text{ clecemes} + \text{Cmesc}[t] \text{ clcemes}) / \text{vmese}, \\ \text{Cmesc}'[t] &= (\text{Cmese}[t] \text{ clecemes} - \text{Cmesc}[t] \text{ clcemes} - \text{Cmesc}[t] \text{ clcnmes} - \\ &\quad \text{Cmesc}[t] \text{ clcpmes} + \text{Cmesn}[t] \text{ clncmes} + \text{Cmesp}[t] \text{ clpcmes}) / \text{vmesc}, \\ \text{Cmesn}'[t] &= (\text{Cmesc}[t] \text{ clcnmes} - \text{Cmesn}[t] \text{ clncmes}) / \text{vmesn}, \\ \text{Cmesp}'[t] &= (\text{Cmesc}[t] \text{ clcpmes} - \text{Cmesp}[t] \text{ clpcmes}) / \text{vmesp}, \end{aligned}$$

$$\begin{aligned} \text{C4b}'[t] &= (\text{rq4} - \text{C4b}[t] \text{ clbe4} + \text{C4e}[t] \text{ cleb4}) / \text{v4b}, \\ \text{C4e}'[t] &= (\text{C4b}[t] \text{ clbe4} - \text{C4e}[t] \text{ cleb4} - \text{C4e}[t] \text{ clec4} + \text{C4c}[t] \text{ clce4}) / \text{v4e}, \\ \text{C4c}'[t] &= (\text{C4e}[t] \text{ clec4} - \text{C4c}[t] \text{ clce4} - \\ &\quad \text{C4c}[t] \text{ clcn4} - \text{C4c}[t] \text{ clcp4} + \text{C4n}[t] \text{ clnc4} + \text{C4p}[t] \text{ clpc4}) / \text{v4c}, \\ \text{C4n}'[t] &= (\text{C4c}[t] \text{ clcn4} - \text{C4n}[t] \text{ clnc4}) / \text{v4n}, \\ \text{C4p}'[t] &= (\text{C4c}[t] \text{ clcp4} - \text{C4p}[t] \text{ clpc4}) / \text{v4p}, \end{aligned}$$

$$\begin{aligned} \text{Cmucb}'[t] &= (\text{rqmuc} - \text{Cmucb}[t] \text{ clbemuc} + \text{Cmuce}[t] \text{ clebmuc}) / \text{vmucb}, \\ \text{Cmuce}'[t] &= (\text{Cmucb}[t] \text{ clbemuc} - \\ &\quad \text{Cmuce}[t] \text{ clebmuc} - \text{Cmuce}[t] \text{ clec muc} + \text{Cmucc}[t] \text{ clcemuc}) / \text{vmuce}, \\ \text{Cmucc}'[t] &= (\text{Cmuce}[t] \text{ clec muc} - \text{Cmucc}[t] \text{ clcemuc} - \text{Cmucc}[t] \text{ clcnmuc} - \\ &\quad \text{Cmucc}[t] \text{ clcp muc} + \text{Cmucn}[t] \text{ clncmuc} + \text{Cmucp}[t] \text{ clpcmuc}) / \text{vmucc}, \\ \text{Cmucn}'[t] &= (\text{Cmucc}[t] \text{ clcnmuc} - \text{Cmucn}[t] \text{ clncmuc}) / \text{vmucn}, \\ \text{Cmucp}'[t] &= (\text{Cmucc}[t] \text{ clcp muc} - \text{Cmucp}[t] \text{ clpcmuc}) / \text{vmucp}, \end{aligned}$$

$$\begin{aligned} \text{Csplb}'[t] &= (\text{rqspl} - \text{Csplb}[t] \text{ clbespl} + \text{Csple}[t] \text{ clebspl}) / \text{vsplb}, \\ \text{Csple}'[t] &= (\text{Csplb}[t] \text{ clbespl} - \\ &\quad \text{Csple}[t] \text{ clebspl} - \text{Csple}[t] \text{ clecspl} + \text{Csplc}[t] \text{ clcespl}) / \text{vsple}, \\ \text{Csplc}'[t] &= (\text{Csple}[t] \text{ clecspl} - \text{Csplc}[t] \text{ clcespl} - \text{Csplc}[t] \text{ clcnspl} - \\ &\quad \text{Csplc}[t] \text{ clcpspl} + \text{Cspln}[t] \text{ clncspl} + \text{Csplp}[t] \text{ clpcspl}) / \text{vsplc}, \\ \text{Cspln}'[t] &= (\text{Csplc}[t] \text{ clcnspl} - \text{Cspln}[t] \text{ clncspl}) / \text{vspln}, \\ \text{Csplp}'[t] &= (\text{Csplc}[t] \text{ clcpspl} - \text{Csplp}[t] \text{ clpcspl}) / \text{vsplp}, \end{aligned}$$

$$\begin{aligned} \text{Clivb}'[t] &= (\text{rqliv} - \text{Clivb}[t] \text{ clbeliv} + \text{Clive}[t] \text{ clebliv}) / \text{vlivb}, \\ \text{Clive}'[t] &= (\text{Clivb}[t] \text{ clbeliv} - \\ &\quad \text{Clive}[t] \text{ clebliv} - \text{Clive}[t] \text{ clecliv} + \text{Clivc}[t] \text{ clceliv}) / \text{vlive}, \\ \text{Clivc}'[t] &= (\text{Clive}[t] \text{ clecliv} - \text{Clivc}[t] \text{ clceliv} - \text{Clivc}[t] \text{ clcnliv} - \text{Clivc}[t] \\ &\quad \text{clclpliv} + \text{Clivn}[t] \text{ clncliv} + \text{Clivp}[t] \text{ clpcliv} - \text{Clivc}[t] \text{ clint}) / \text{vlivc}, \\ \text{Clivn}'[t] &= (\text{Clivc}[t] \text{ clcnliv} - \text{Clivn}[t] \text{ clncliv}) / \text{vlivn}, \\ \text{Clivp}'[t] &= (\text{Clivc}[t] \text{ clclpliv} - \text{Clivp}[t] \text{ clpcliv}) / \text{vlivp}, \end{aligned}$$

```

Cbrnb'[t] == (rqbrn - Cbrnb[t] clbabrn + Cbrnam[t] clabbrn) / vbrnb,
Cbrnam'[t] ==
  (Cbrnb[t] clbabrn - Cbrnam[t] clabbrn - Cbrnam[t] claebrn + Cbrne[t] cleabr) /
  vbrnam, Cbrne'[t] == (Cbrnam[t] claebrn - Cbrne[t] cleabr -
  Cbrne[t] clecbrn + Cbrnc[t] clcebrn) / vbrne,
Cbrnc'[t] == (Cbrne[t] clecbrn - Cbrnc[t] clcebrn - Cbrnc[t] clcnbrn -
  Cbrnc[t] clcpbrn + Cbrnn[t] clncbrn + Cbrnp[t] clpcbrn) / vbrnc,
Cbrnn'[t] == (Cbrnc[t] clcnbrn - Cbrnn[t] clncbrn) / vbrnn,
Cbrnp'[t] == (Cbrnc[t] clcpbrn - Cbrnp[t] clpcbrn) / vbrnp,

Cab'[t] == (qc (Clunb[t] - Cab[t])) / vtab,
Cvb'[t] == (q1 C1b[t] + qadp Cadpb[t] + q2 C2b[t] + q3 C3b[t] + q4 C4b[t] +
  qliv Clivb[t] + qbrn Cbrnb[t] - Cvb[t] fe cl / bp + k0[t] - qc Cvb[t]) / vtvb -
  Cneg Cvb[t] (1000. / mw) fup / bp kon + Cnegd[t] koff,

Cnegd'[t] == Cneg Cvb[t] (1000. / mw) fup / bp kon - Cnegd[t] koff,

k0'[t] == 0, k0[0] == kinf, WhenEvent[t == ivduration, k0[t] → 0.],
C1b[0] == 0, C1e[0] == 0, C1c[0] == 0, C1n[0] == 0, C1p[0] == 0, Cadpb[0] == 0,
Cadpe[0] == 0, Cadpc[0] == 0, Cadpn[0] == 0, Cadpp[0] == 0, C2b[0] == 0, C2e[0] == 0,
C2c[0] == 0, C2n[0] == 0, C2p[0] == 0, C3b[0] == 0, C3e[0] == 0, C3c[0] == 0, C3n[0] == 0,
C3p[0] == 0, Clunb[0] == 0, Clune[0] == 0, Clunc[0] == 0, Clunn[0] == 0, Clunp[0] == 0,
Cmesb[0] == 0, Cmes[0] == 0, Cmesc[0] == 0, Cmesn[0] == 0, Cmesp[0] == 0, C4b[0] == 0,
C4e[0] == 0, C4c[0] == 0, C4n[0] == 0, C4p[0] == 0, Cmucb[0] == 0, Cmuce[0] == 0,
Cmucc[0] == 0, Cmucn[0] == 0, Cmucp[0] == 0, Csplb[0] == 0, Csple[0] == 0, Csplc[0] == 0,
Cspln[0] == 0, Csplp[0] == 0, Clivb[0] == 0, Clive[0] == 0, Clivc[0] == 0,
Clivn[0] == 0, Clivp[0] == 0, Cbrnb[0] == 0, Cbrnam[0] == 0, Cbrne[0] == 0,
Cbrnc[0] == 0, Cbrnn[0] == 0, Cbrnp[0] == 0, Cvb[0] == 0, Cab[0] == 0, Cnegd[0] == 0},
{C1b, C1e, C1c, C1n, C1p, Cadpb, Cadpe, Cadpc, Cadpn, Cadpp, C2b, C2e, C2c, C2n,
C2p, C3b, C3e, C3c, C3n, C3p, Clunb, Clune, Clunc, Clunn, Clunp, Cmesb, Cmes,
Cmesc, Cmesn, Cmesp, C4b, C4e, C4c, C4n, C4p, Cmucb, Cmuce, Cmucc, Cmucn, Cmucp,
Csplb, Csple, Csplc, Cspln, Csplp, Clivb, Clive, Clivc, Clivn, Clivp, Cbrnb,
Cbrnam, Cbrne, Cbrnc, Cbrnn, Cbrnp, Cvb, Cab, k0, Cnegd}, {t, 0, 20 Max[tt]}};

```

---

Calculate Kp,uu liver

In[ ]:= Clivc[Max[tt]] /. pbpk3

Out[ ]:= {0.000550734}

In[ ]:= fup Cvb[Max[tt]] / bp /. pbpk3

Out[ ]:= {0.000226382}

In[ ]:= kpuuliver = (Clivc[Max[tt]]) / (fup Cvb[Max[tt]] / bp) /. pbpk3

Out[ ]:= {2.43276}

---

```
In[ ]:= auc3 = NIntegrate[(Cvb[t] / bp) /. pbpk3, {t, 0, 20 Max[tt]}] [[1]]
```

```
Out[ ]:= 34.0529
```

```
In[ ]:= cl3 = dose / auc3
```

```
Out[ ]:= 0.293661
```

```
In[ ]:= cl / cl3
```

```
Out[ ]:= 1.
```

```
In[ ]:= aumc3 = NIntegrate[(t Cvb[t] / bp) /. pbpk3, {t, 0, 20 Max[tt]}] [[1]]
```

```
Out[ ]:= 11567.2
```

```
In[ ]:= mrt3 = aumc3 / auc3 - (ivduration / 2)
```

```
Out[ ]:= 339.183
```

```
In[ ]:= vss3 = cl3 mrt3
```

```
Out[ ]:= 99.6049
```

```
In[ ]:= thalf3 = 0.693 / ((Log[Cvb[Max[tt]] / bp] - Log[Cvb[1.2 Max[tt]] / bp]) /  
    (1.2 Max[tt] - Max[tt])) /. pbpk3 [[1]]
```

```
Out[ ]:= 407.744
```

```
In[ ]:= plot3 = LogPlot[(70. / avgwt Cvb[t] / bp) /. pbpk3, {t, 0, 1.1 Max[tt]},  
    PlotRange -> {{0, 1.1 Max[tt]}, {0.5 Min[ct], 1.8 Max[ct]}}, PlotStyle -> {Black},  
    Frame -> True, FrameStyle -> Directive[Black, 14, Thickness[0.003]],  
    LabelStyle -> Directive[Plain, FontFamily -> "Arial Unicode MS"],  
    FrameLabel -> {"time, min", "concentration, µg/mL"}, ImageSize -> Medium];
```

```
In[ ]:= Show[plot3, plot2, plot1, plotfit1]
```

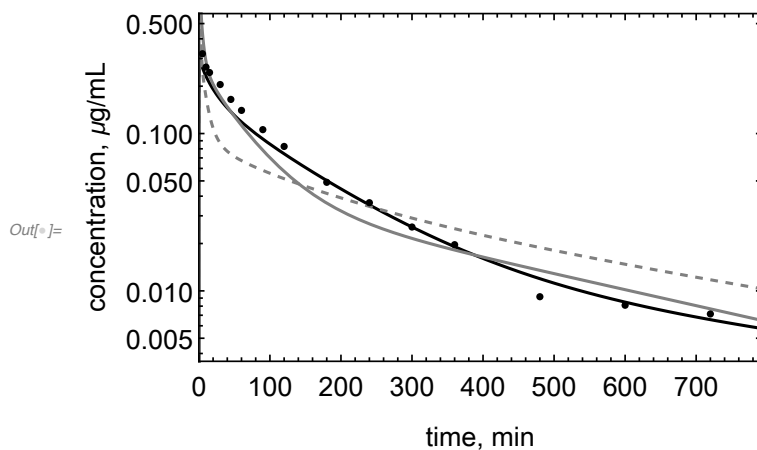

```

In[ ]:= plot4 = LogPlot[(70. / avgwt Cvb[t] / bp) /. pbpk3, {t, 0, 1.1 Max[tt]},
  PlotRange -> {{0, 100}, {0.5 Min[ct], 1.8 Max[ct]}}, PlotStyle -> {Black},
  Frame -> True, FrameStyle -> Directive[Black, 14, Thickness[0.003]],
  LabelStyle -> Directive[Plain, FontFamily -> "Arial Unicode MS"],
  FrameLabel -> {"time, min", "concentration, µg/mL"}, ImageSize -> Medium];

```

```

In[ ]:= Show[plot4, plot2, plot1, plotfit1]

```

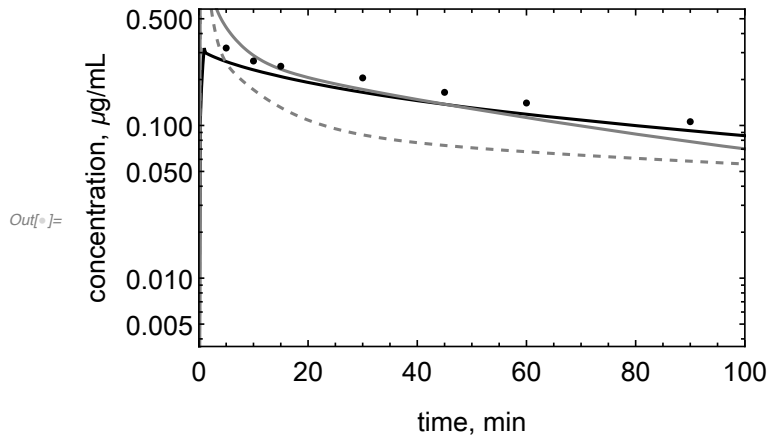

## Calculate Overlaps

```

In[ ]:= aucintIV = NIntegrate[(Xc[t] / V1) /. modelpkiv2, {t, 0, 20 Max[tt]}]

```

```

Out[ ]:= 34.0528

```

```

In[ ]:= overlap1 = NIntegrate[Min[(Xc[t] / V1) /. modelpkiv2, (70. / avgwt Cvp[t]) /. pbpk1],
  {t, 0, 20 Max[tt]}, PrecisionGoal -> 4]

```

```

Out[ ]:= 24.2541

```

```

In[ ]:= overlap2 = NIntegrate[Min[(Xc[t] / V1) /. modelpkiv2, (70. / avgwt Cvp[t]) /. pbpk2],
  {t, 0, 20 Max[tt]}, PrecisionGoal -> 4]

```

```

Out[ ]:= 29.0016

```

```

In[ ]:= overlap3 = NIntegrate[Min[(Xc[t] / V1) /. modelpkiv2, (70. / avgwt Cvb[t] / bp) /. pbpk3],
  {t, 0, 20 Max[tt]}, PrecisionGoal -> 4]

```

```

Out[ ]:= 30.8028

```

```

In[ ]:= eocrodgers = overlap1 / aucintIV

```

```

Out[ ]:= 0.712247

```

```

In[ ]:= eocfum = overlap2 / aucintIV

```

```

Out[ ]:= 0.851665

```

```
In[ ]:= eocpqnet = overlap3 / aucintIV
```

```
Out[ ]:= 0.904557
```

```
In[ ]:= plotoverlap1 = Plot[Min[(Xc[t] / V1) /. modelpkiv2, (70. / avgwt Cvp[t]) /. pbpk1],
  {t, 0, Max[tt] 1.2}, PlotRange -> {{0, 1.1 Max[tt]}, {0, 1.2 Max[ct]}},
  PlotStyle -> Green, Filling -> Axis, Frame -> True,
  FrameStyle -> Directive[Black, 14, Thickness[0.003]],
  LabelStyle -> (FontFamily -> "Arial"), FrameLabel -> {"[time, min]", "C, µg/L"}];
```

```
In[ ]:= Show[plotoverlap1, plotfit4, plotfit3]
```

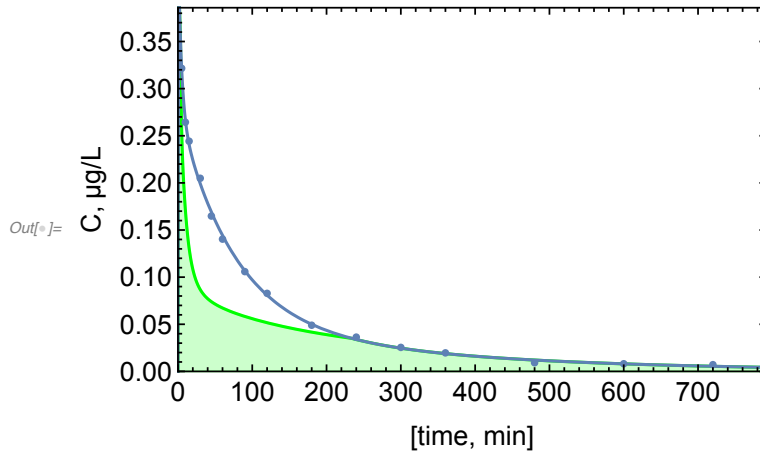

```
In[ ]:= plotoverlap2 = Plot[Min[(Xc[t] / V1) /. modelpkiv2, (70. / avgwt Cvp[t]) /. pbpk2],
  {t, 0, Max[tt] 1.2}, PlotRange -> {{0, Max[tt] 1.2}, {0, 1.2 Max[ct]}},
  PlotStyle -> Green, Filling -> Axis, Frame -> True,
  FrameStyle -> Directive[Black, 14, Thickness[0.003]],
  LabelStyle -> (FontFamily -> "Arial"), FrameLabel -> {"[time, min]", "C, µg/L"}];
```

```
In[ ]:= Show[plotoverlap2, plotfit4, plotfit3]
```

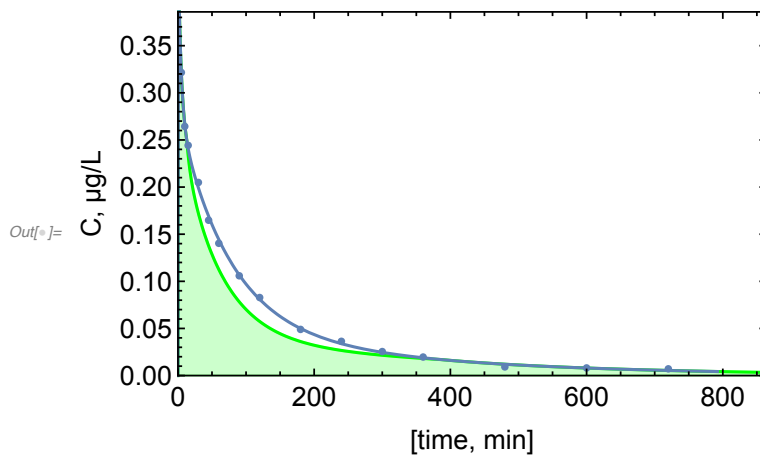

```

In[ ]:= plotoverlap3 = Plot[Min[(Xc[t] / V1) /. modelpkiv2, (70. / avgwt Cvb[t] / bp) /. pbpk3],
  {t, 0, Max[tt] 1.2}, PlotRange -> {{0, Max[tt] 1.2}, {0, 1.2 Max[ct]}},
  PlotStyle -> Green, Filling -> Axis, Frame -> True,
  FrameStyle -> Directive[Black, 14, Thickness[0.003]],
  LabelStyle -> (FontFamily -> "Arial"), FrameLabel -> {"[time, min]", "C, µg/L"}];

```

```

In[ ]:= Show[plotoverlap3, plotfit4, plotfit3]

```

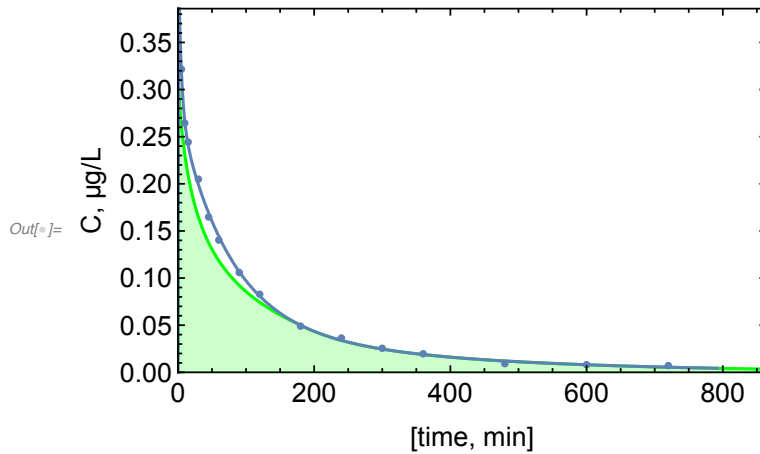

```

In[ ]:= TableForm[{{"Vss expt", "Vss RR", "Vss fum", "Vss PermQ", "t1/2 expt", "t1/2 RR",
  "t1/2 fum", "t1/2 PermQ", "EOC RR", "EOC fum", "EOC PermQ"}, {vssnc, vss1,
  vss2, vss3, thalfexp, thalf1, thalf2, thalf3, eocrodgers, eocfum, eocpnet}}]

```

Out[ ]//TableForm=

| Vss expt | Vss RR  | Vss fum | Vss PermQ | t <sup>1/2</sup> expt | t <sup>1/2</sup> RR | t <sup>1/2</sup> fum | t <sup>1/2</sup> P |
|----------|---------|---------|-----------|-----------------------|---------------------|----------------------|--------------------|
| 55.8876  | 123.183 | 71.3616 | 99.6049   | 214.006               | 382.76              | 296.811              | 407.74             |
